# Supplementary material for: Biological determinants of bladder cancer gene expression subtypes
Source: PubMed Central journal article supplement (PMC4650643; doi:10.1038/srep10957), 2015-06-08
Supplement: srep10957-s1.pdf [file srep10957-s1.pdf]

## Supplementary Information

### Biological determinants of bladder cancer gene expression subtypes

Mattias Aine, Pontus Eriksson, Fredrik Liedberg, Gottfrid Sjö Dahl, Mattias Höglund

#### Supplementary Figure Legends

**Supplementary Figure 1 | Substratification of the three main subgroups of tumors.** (a-c) Heatmap visualization of sample coclustering frequencies for two-group splits of the CC1 (a), CC2 (b), and CC3 (c) subgroups generated using ConsensusClusterPlus in R. (d-e) Heatmap visualization of the UNC- (d) and MDA (e) classifier genes across the six consensus subgroups.

**Supplementary Figure 2 | CC1-2 subgroup tumors exhibit high VIM and variable CDH1 expression.**

Uncentered mRNA expression levels of the genes *VIM* (Vimentin) and *CDH1* (E-cadherin) across the consensus cluster subgroups with Lund molecular subtype indicated (a). Boxplots showing relative difference in mRNA expression between the CC1-2 and CC3-1 subgroups for genes related to EMT (b), epithelial differentiation (c) and urothelial differentiation (d).

**Supplementary Figure 3 | UC gene expression classifier calls across TCGA tumor samples.**

TCGA samples were classified using UNC, MDA and Lund gene expression centroids with Pearson correlation as the similarity metric. Final sample-level classifier calls and correlations to the respective centroids are shown in heatmap format for the three classification systems and consensus cluster subgroups.

#### Supplementary Figures

# Supplementary Figure 1 - Höglund

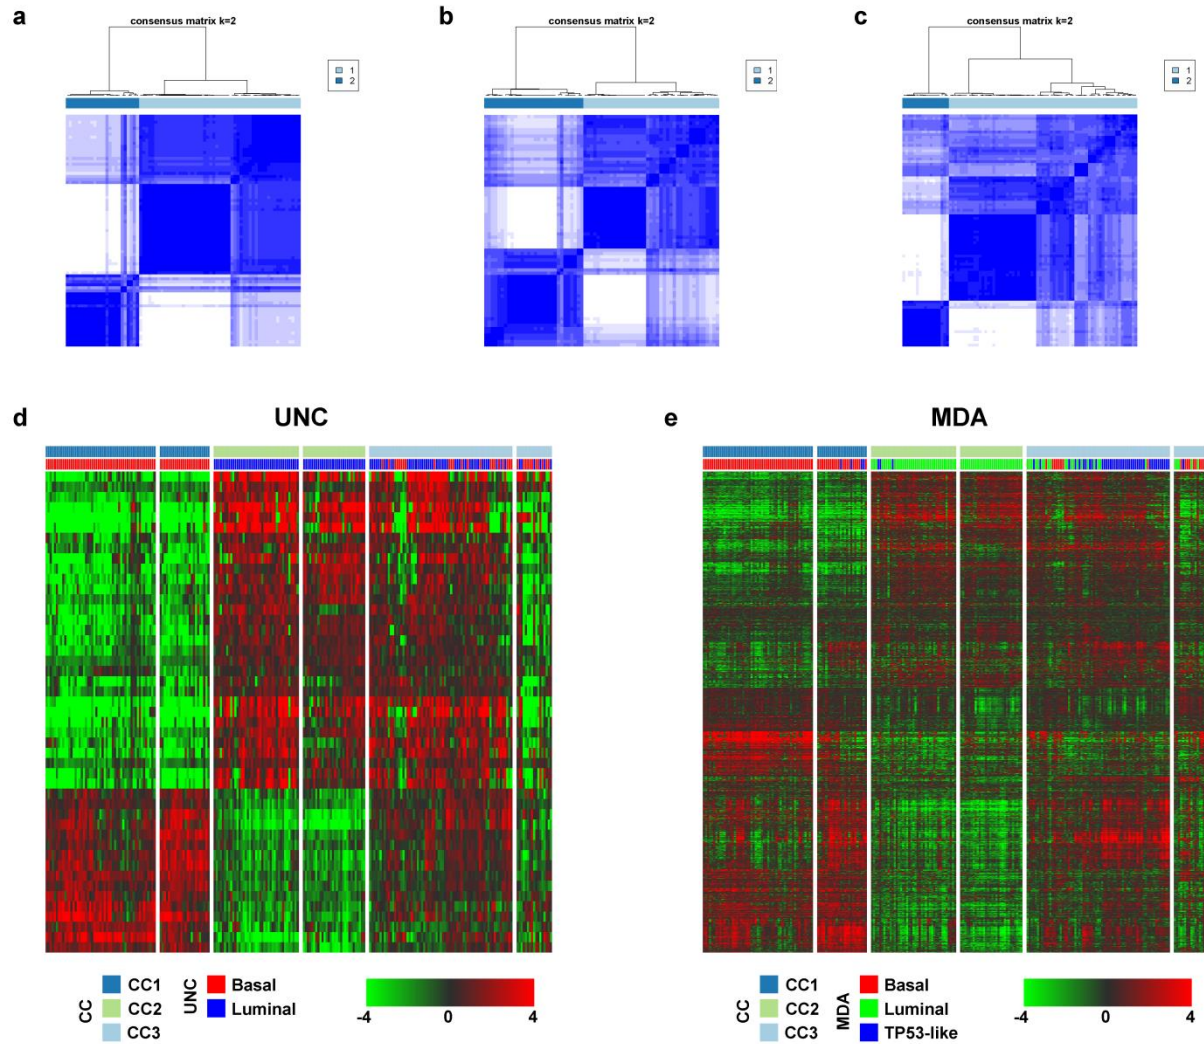

Supplementary Figure 2 - Höglund

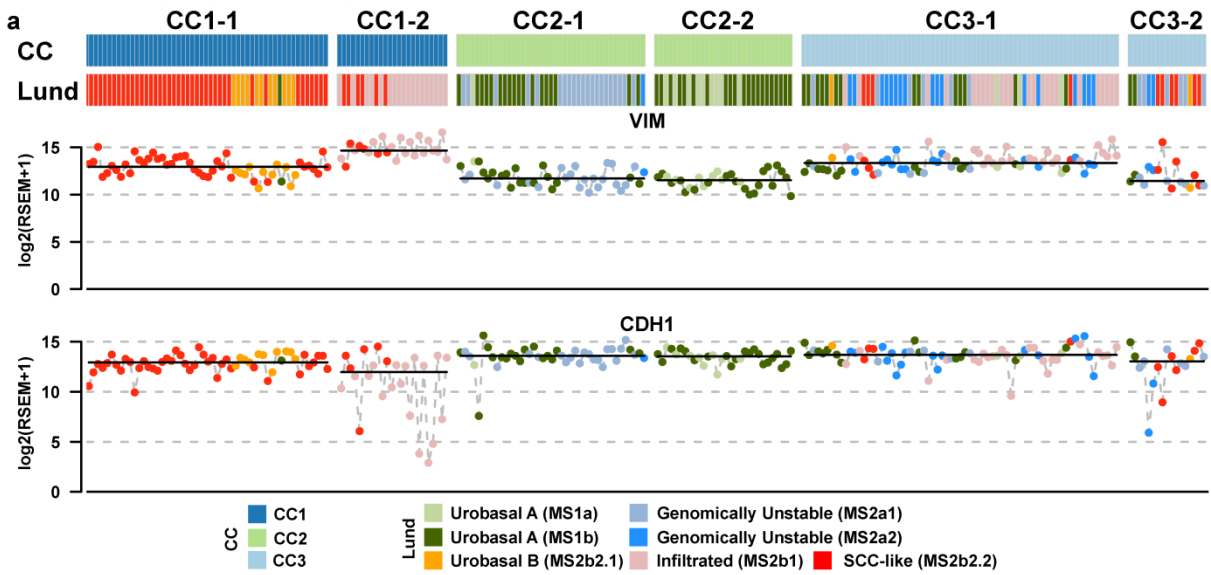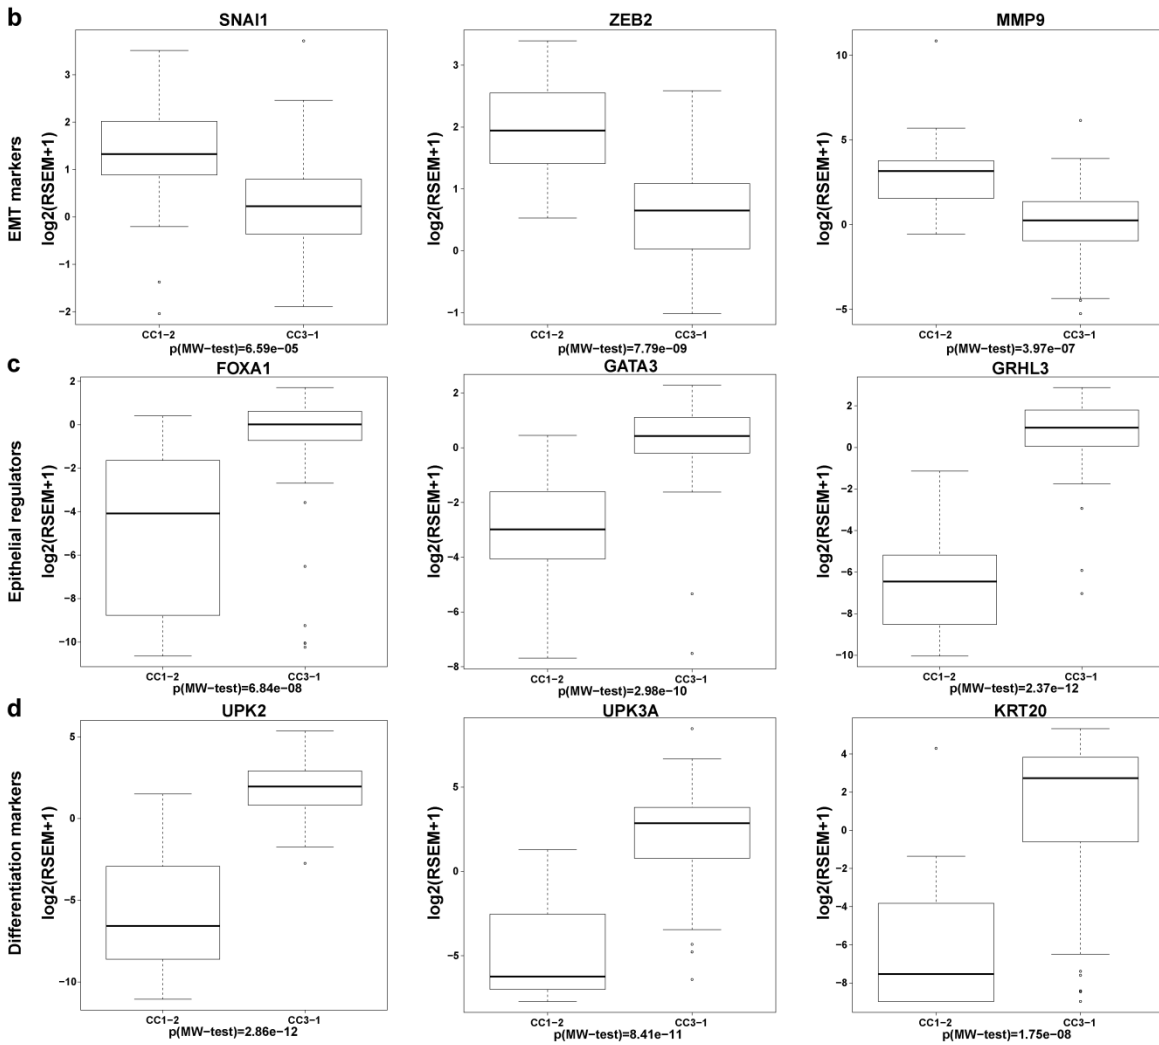

Supplementary Figure 3 - Höglund

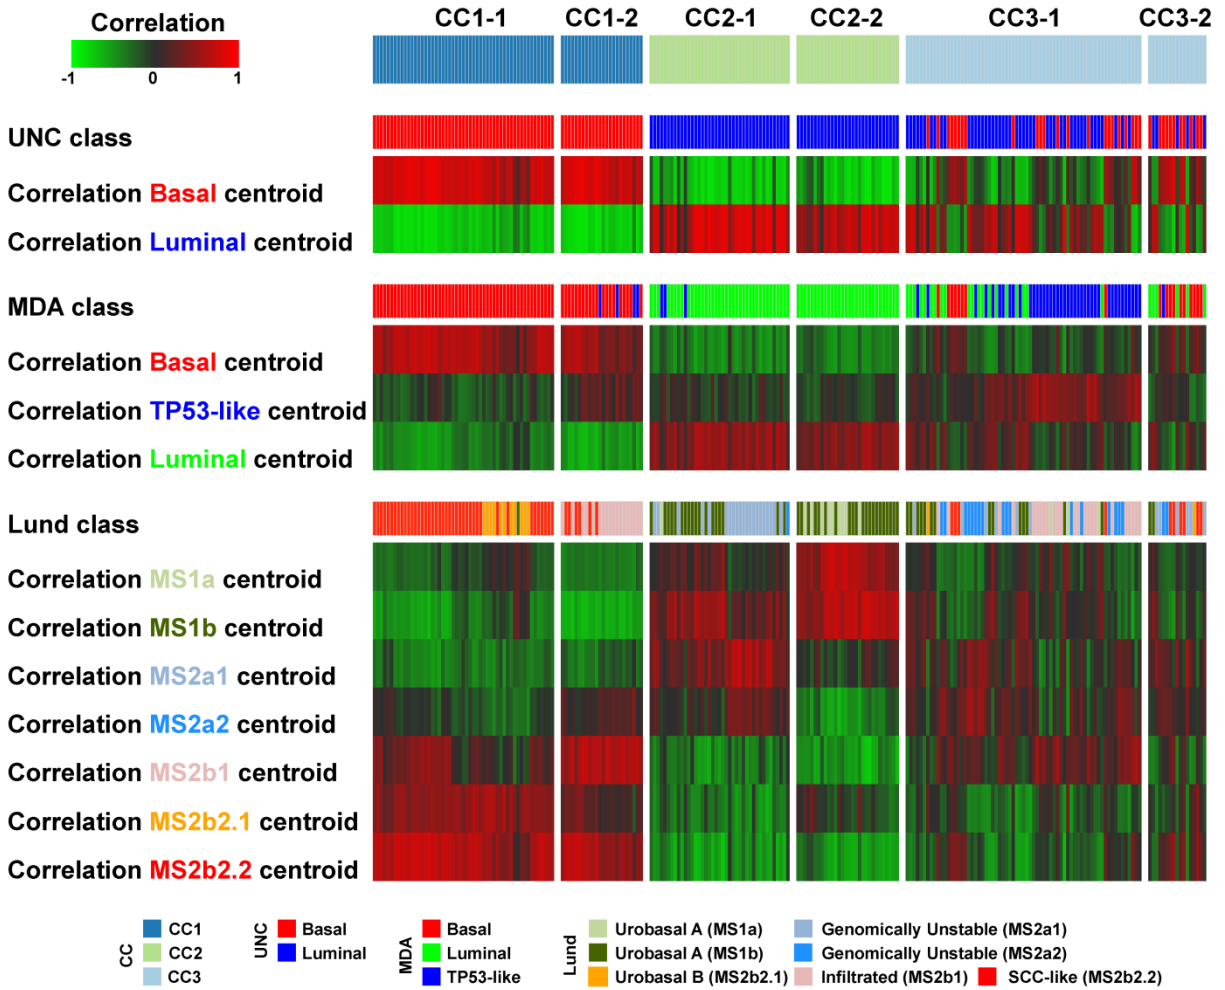

Supplementary table 1

AmiGO analysis ([amigo.geneontology.org/rte](http://amigo.geneontology.org/rte)) output for differentially expressed genes between CC1 and CC2, table derived using PANTHER ([go.pantherdb.org](http://go.pantherdb.org))

Significant GO-terms for CC1 upregulated- (N=2886) and downregulated (N=3233) genes, output truncated at  $p(\text{bonferroni}) < 0.05$  or top 25 GO-terms

Analysis Type: PANTHER Overrepresentation Test (release 20141219)

Annotation Version and Release Date: GO Ontology database Released 2015-02-17

Reference List: Homo sapiens (all genes in database)

Bonferroni correction: TRUE

**CC1 upregulated genes**

| GO biological process complete               | Enrichment/Depletion | p(bonferroni) |
|----------------------------------------------|----------------------|---------------|
| immune system process                        | +                    | 7.48E-117     |
| biological_process                           | +                    | 5.99E-105     |
| single-organism process                      | +                    | 1.32E-97      |
| response to stimulus                         | +                    | 5.31E-96      |
| immune response                              | +                    | 2.15E-93      |
| single-organism cellular process             | +                    | 9.64E-92      |
| defense response                             | +                    | 1.95E-89      |
| response to stress                           | +                    | 1.14E-82      |
| biological regulation                        | +                    | 1.12E-75      |
| regulation of immune system process          | +                    | 2.44E-73      |
| regulation of response to stimulus           | +                    | 7.02E-73      |
| positive regulation of biological process    | +                    | 5.98E-69      |
| regulation of biological process             | +                    | 1.27E-65      |
| positive regulation of response to stimulus  | +                    | 1.31E-61      |
| cellular response to stimulus                | +                    | 2.14E-60      |
| positive regulation of immune system process | +                    | 1.71E-59      |
| regulation of cellular process               | +                    | 3.37E-59      |
| cellular process                             | +                    | 4.65E-57      |
| signal transduction                          | +                    | 5.87E-57      |
| single organism signaling                    | +                    | 1.34E-56      |
| signaling                                    | +                    | 1.34E-56      |
| cell communication                           | +                    | 4.22E-56      |
| response to external stimulus                | +                    | 1.36E-55      |
| positive regulation of cellular process      | +                    | 1.93E-51      |
| biological adhesion                          | +                    | 5.29E-51      |

**CC1 downregulated genes**

| GO biological process complete                                         | Enrichment/Depletion | p(bonferroni) |
|------------------------------------------------------------------------|----------------------|---------------|
| biological_process                                                     | +                    | 2.11E-33      |
| cellular process                                                       | +                    | 2.83E-18      |
| biological regulation                                                  | +                    | 9.50E-15      |
| transcription, DNA-templated                                           | +                    | 9.35E-12      |
| nucleic acid-templated transcription                                   | +                    | 9.97E-12      |
| lipid metabolic process                                                | +                    | 1.88E-11      |
| regulation of biological process                                       | +                    | 1.49E-10      |
| detection of chemical stimulus involved in sensory perception of smell | -                    | 3.27E-10      |
| regulation of transcription, DNA-templated                             | +                    | 3.49E-10      |
| regulation of nucleic acid-templated transcription                     | +                    | 8.93E-10      |
| regulation of cellular process                                         | +                    | 9.35E-10      |
| translation                                                            | -                    | 1.11E-09      |
| regulation of RNA biosynthetic process                                 | +                    | 2.25E-09      |
| biosynthetic process                                                   | +                    | 2.29E-09      |
| RNA biosynthetic process                                               | +                    | 3.37E-09      |
| cellular lipid metabolic process                                       | +                    | 3.97E-09      |
| regulation of RNA metabolic process                                    | +                    | 5.51E-09      |
| organic substance biosynthetic process                                 | +                    | 5.55E-09      |
| cellular macromolecule catabolic process                               | -                    | 5.99E-09      |
| small molecule metabolic process                                       | +                    | 2.16E-08      |
| sensory perception of smell                                            | -                    | 2.38E-08      |
| detection of chemical stimulus involved in sensory perception          | -                    | 2.49E-08      |
| xenobiotic metabolic process                                           | +                    | 3.29E-08      |
| cellular response to xenobiotic stimulus                               | +                    | 4.15E-08      |
| single-organism process                                                | +                    | 4.50E-08      |

Supplementary table 2

AmiGO analysis ([amigo.geneontology.org/rte](http://amigo.geneontology.org/rte)) output for genes upregulated in CC3-1 vs CC1-2, table derived using PANTHER ([go.pantherdb.org](http://go.pantherdb.org))

Significant GO-terms for CC3-1 upregulated genes (N=1984), output truncated at  $p(\text{bonferroni}) < 0.05$  or top 25 GO-terms

Analysis Type: PANTHER Overrepresentation Test (release 20141219)

Annotation Version and Release Date: GO Ontology database Released 2015-02-17

Reference List: Homo sapiens (all genes in database)

Bonferroni correction: TRUE

| GO biological process complete             | Enrichment/Depletion | p(bonferroni) |
|--------------------------------------------|----------------------|---------------|
| biological_process                         | +                    | 4.95E-24      |
| lipid metabolic process                    | +                    | 5.86E-19      |
| cellular lipid metabolic process           | +                    | 2.14E-14      |
| cellular process                           | +                    | 8.22E-11      |
| organic hydroxy compound metabolic process | +                    | 1.60E-09      |
| small molecule metabolic process           | +                    | 1.56E-08      |
| fatty acid metabolic process               | +                    | 1.70E-08      |
| biosynthetic process                       | +                    | 3.51E-08      |
| lipid biosynthetic process                 | +                    | 5.20E-08      |
| carboxylic acid metabolic process          | +                    | 6.16E-08      |
| single-organism process                    | +                    | 1.46E-07      |
| oxoacid metabolic process                  | +                    | 1.66E-07      |
| organic acid metabolic process             | +                    | 1.71E-07      |
| organic substance biosynthetic process     | +                    | 1.87E-07      |
| monocarboxylic acid metabolic process      | +                    | 1.94E-07      |
| metabolic process                          | +                    | 1.78E-06      |
| epithelial cell differentiation            | +                    | 2.29E-06      |
| organic acid catabolic process             | +                    | 3.57E-06      |
| carboxylic acid catabolic process          | +                    | 3.57E-06      |
| cellular biosynthetic process              | +                    | 4.66E-06      |
| organic substance metabolic process        | +                    | 1.04E-05      |
| biological regulation                      | +                    | 1.11E-05      |
| primary metabolic process                  | +                    | 1.24E-05      |
| small molecule catabolic process           | +                    | 1.36E-05      |
| monocarboxylic acid catabolic process      | +                    | 1.42E-05      |

Supplementary table 3

AmiGO analysis ([amigo.geneontology.org/rte](http://amigo.geneontology.org/rte)) output for genes upregulated in CC3-2 vs rest, table derived using PANTHER ([go.pantherdb.org](http://go.pantherdb.org))

Significant GO-terms for CC3-2 upregulated genes (N=289), output truncated at  $p(\text{bonferroni}) < 0.05$  or top 25 GO-terms

Analysis Type: PANTHER Overrepresentation Test (release 20141219)

Annotation Version and Release Date: GO Ontology database Released 2015-02-17

Reference List: Homo sapiens (all genes in database)

Bonferroni correction: TRUE

| GO biological process complete                   | Enrichment/Depletion | p(bonferroni) |
|--------------------------------------------------|----------------------|---------------|
| cell cycle                                       | +                    | 6.50E-12      |
| mitotic cell cycle                               | +                    | 2.89E-10      |
| mitotic cell cycle process                       | +                    | 7.00E-09      |
| cell cycle process                               | +                    | 9.19E-08      |
| single-organism process                          | +                    | 1.95E-07      |
| organelle fission                                | +                    | 5.11E-07      |
| cellular process                                 | +                    | 5.64E-07      |
| biological_process                               | +                    | 6.73E-07      |
| nuclear division                                 | +                    | 8.19E-07      |
| single-organism cellular process                 | +                    | 5.10E-06      |
| DNA metabolic process                            | +                    | 1.31E-05      |
| mitotic nuclear division                         | +                    | 2.75E-05      |
| organelle organization                           | +                    | 6.73E-05      |
| biological regulation                            | +                    | 3.50E-04      |
| single-organism organelle organization           | +                    | 3.73E-04      |
| chromosome organization                          | +                    | 6.32E-04      |
| regulation of biological process                 | +                    | 8.57E-04      |
| cell division                                    | +                    | 9.95E-04      |
| regulation of cellular process                   | +                    | 1.03E-03      |
| chromosome segregation                           | +                    | 1.13E-03      |
| nucleic acid metabolic process                   | +                    | 1.27E-03      |
| nucleobase-containing compound metabolic process | +                    | 1.82E-03      |
| cellular component organization                  | +                    | 1.88E-03      |
| anatomical structure development                 | +                    | 3.17E-03      |
| meiotic cell cycle                               | +                    | 4.56E-03      |

**Supplementary table 4**AmiGO analysis ([amigo.geneontology.org/rte](http://amigo.geneontology.org/rte)) output for genes upregulated in CC2-2 vs rest, table derived using PANTHER ([go.pantherdb.org](http://go.pantherdb.org))Significant GO-terms for CC2-2 upregulated- (N=511) and downregulated (N=1030) genes, output truncated at  $p(\text{bonferroni}) < 0.05$  or top 25 GO-terms

Analysis Type: PANTHER Overrepresentation Test (release 20141219)

Annotation Version and Release Date: GO Ontology database Released 2015-02-17

Reference List: Homo sapiens (all genes in database)

Bonferroni correction: TRUE

**CC2-2 upregulated genes**

| GO biological process complete                                      | Enrichment/Depletion | p(bonferroni) |
|---------------------------------------------------------------------|----------------------|---------------|
| SRP-dependent cotranslational protein targeting to membrane         | +                    | 3.83E-29      |
| cotranslational protein targeting to membrane                       | +                    | 7.37E-29      |
| protein targeting to ER                                             | +                    | 1.02E-28      |
| establishment of protein localization to endoplasmic reticulum      | +                    | 3.59E-28      |
| viral transcription                                                 | +                    | 2.51E-27      |
| nuclear-transcribed mRNA catabolic process, nonsense-mediated decay | +                    | 1.13E-26      |
| protein localization to endoplasmic reticulum                       | +                    | 4.70E-26      |
| viral gene expression                                               | +                    | 4.79E-26      |
| translational termination                                           | +                    | 2.03E-25      |
| multi-organism metabolic process                                    | +                    | 2.49E-25      |
| cellular protein complex disassembly                                | +                    | 5.02E-24      |
| protein targeting to membrane                                       | +                    | 3.84E-23      |
| translational elongation                                            | +                    | 5.38E-23      |
| protein complex disassembly                                         | +                    | 1.55E-22      |
| macromolecular complex disassembly                                  | +                    | 5.96E-22      |
| nuclear-transcribed mRNA catabolic process                          | +                    | 3.20E-21      |
| RNA catabolic process                                               | +                    | 1.33E-20      |
| viral life cycle                                                    | +                    | 1.52E-20      |
| mRNA catabolic process                                              | +                    | 1.97E-20      |
| translational initiation                                            | +                    | 2.97E-20      |
| establishment of protein localization to membrane                   | +                    | 2.55E-19      |
| aromatic compound catabolic process                                 | +                    | 5.64E-17      |
| nucleobase-containing compound catabolic process                    | +                    | 1.39E-16      |
| organic cyclic compound catabolic process                           | +                    | 2.16E-16      |
| cellular nitrogen compound catabolic process                        | +                    | 2.80E-16      |

**CC2-2 downregulated genes**

| GO biological process complete                | Enrichment/Depletion | p(bonferroni) |
|-----------------------------------------------|----------------------|---------------|
| single-organism process                       | +                    | 4.40E-43      |
| biological_process                            | +                    | 1.15E-40      |
| single-organism cellular process              | +                    | 9.97E-40      |
| mitotic cell cycle                            | +                    | 4.73E-33      |
| cellular process                              | +                    | 1.05E-31      |
| cell cycle                                    | +                    | 6.22E-31      |
| cell cycle process                            | +                    | 1.28E-27      |
| mitotic cell cycle process                    | +                    | 6.73E-27      |
| biological phase                              | +                    | 1.84E-26      |
| mitotic cell cycle phase                      | +                    | 4.84E-26      |
| cell cycle phase                              | +                    | 4.84E-26      |
| nuclear division                              | +                    | 4.01E-22      |
| organelle fission                             | +                    | 3.45E-21      |
| biological regulation                         | +                    | 6.92E-21      |
| response to stress                            | +                    | 1.22E-19      |
| cellular component organization               | +                    | 2.23E-19      |
| response to stimulus                          | +                    | 1.32E-18      |
| mitotic nuclear division                      | +                    | 3.01E-18      |
| cellular component organization or biogenesis | +                    | 6.95E-18      |
| cellular response to stimulus                 | +                    | 7.54E-18      |
| mitotic prometaphase                          | +                    | 2.25E-17      |
| regulation of cellular process                | +                    | 4.64E-17      |
| regulation of biological process              | +                    | 7.67E-17      |
| cell division                                 | +                    | 3.83E-16      |
| positive regulation of biological process     | +                    | 9.45E-16      |



**Supplementary table 5**

Files downloaded through the TCGA public ftp-site available at "[https://tcga-data.nci.nih.gov/tcgafiles/ftp\\_auth/distro\\_ftpusers/anonymous/tumor/blca/](https://tcga-data.nci.nih.gov/tcgafiles/ftp_auth/distro_ftpusers/anonymous/tumor/blca/)"

**TCGA sample clusters file according to TCGA, Nature, Volume 507 Number 7492, 315-322, Mar. 20, 2014 [doi:10.1038]**

BLCA\_cluster-assign-k4.tsv

**TCGA somatic variant annotation file**

PR\_TCGA\_BLCA\_PAIR\_Capture\_All\_Pairs\_QCPASS\_v5.aggregated.capture.tcga.uid.automated.somatic.maf

**TCGA gene expression files**

unc.edu.09898301-3dac-4b86-af1b-6cbad9f2d380.1182808.rsem.isoforms.normalized\_results  
unc.edu.8038ffba-38d5-437a-9457-4943c0202a8a.2307668.rsem.isoforms.normalized\_results  
unc.edu.ac9729e9-6565-4e11-8828-ff43b752a5b6.2097421.rsem.isoforms.normalized\_results  
unc.edu.370c2202-46b7-4721-a1db-ee80f6ca7782.2116096.rsem.isoforms.normalized\_results  
unc.edu.4c4fbc19-727b-48b0-82e0-42ca8309f315.1384825.rsem.isoforms.normalized\_results  
unc.edu.c07c2f21-21d4-49cb-93bb-8d128966fcd6.1351737.rsem.isoforms.normalized\_results  
unc.edu.d7c8fab5-a3c9-4650-9935-56c0fe27cbe6.1468997.rsem.isoforms.normalized\_results  
unc.edu.bd49f808-37de-43a4-8a5f-7a36b9661a16.1987611.rsem.isoforms.normalized\_results  
unc.edu.57baff29-25d2-46ce-937f-f25343dcebc3.2031731.rsem.isoforms.normalized\_results  
unc.edu.169e537f-9ffc-4d56-9e77-1f38951ee3d3.1475175.rsem.isoforms.normalized\_results  
unc.edu.18bb3804-de1e-4988-abbf-89c36d07cc01.1966968.rsem.isoforms.normalized\_results  
unc.edu.cfb10485-b097-4470-bd7e-5ed2abd2e8ac.1181243.rsem.isoforms.normalized\_results  
unc.edu.a83e6d94-8bef-4ffe-889a-2eccc4b97cae.2120613.rsem.isoforms.normalized\_results  
unc.edu.c270c34c-0cfd-410e-ab3c-231033196d25.1113454.rsem.isoforms.normalized\_results  
unc.edu.341d1383-93bd-42d7-80ad-5dba732c1925.2116249.rsem.isoforms.normalized\_results  
unc.edu.842484b0-6661-4dc2-bf70-b1216ab05475.2316269.rsem.isoforms.normalized\_results  
unc.edu.9ad7733f-a2a6-4985-8ed3-d2c539eab96.1474832.rsem.isoforms.normalized\_results  
unc.edu.a45e5587-488f-4348-a724-fe64e0c5be7d.1351225.rsem.isoforms.normalized\_results  
unc.edu.d68e2da7-7bd4-4510-8751-02e9f16ad4e6.2095487.rsem.isoforms.normalized\_results  
unc.edu.fa74ebb2-007d-407a-ba07-12976b75056d.2306747.rsem.isoforms.normalized\_results  
unc.edu.1a1e861c-14bd-45ea-904a-b14d4059ac95.1350519.rsem.isoforms.normalized\_results  
unc.edu.c8fd7f63-e309-4a7e-876d-7ca2cf954abe.2309041.rsem.isoforms.normalized\_results  
unc.edu.32d604cb-3bf5-427c-b60d-3c9cfef7f0a5.1352036.rsem.isoforms.normalized\_results  
unc.edu.958520af-f270-49ab-8fb6-57e1ae8ae68f.1179858.rsem.isoforms.normalized\_results  
unc.edu.20da407e-268c-4a10-9d1f-751974e09067.2089887.rsem.isoforms.normalized\_results  
unc.edu.f6660fd-6277-4eb7-8135-5aea56fedd7c.2306172.rsem.isoforms.normalized\_results  
unc.edu.fac8f7fd-3e80-410a-a281-2b564862b335.1227036.rsem.isoforms.normalized\_results  
unc.edu.74cbc344-560b-439b-bd14-1542ce579967.2158457.rsem.isoforms.normalized\_results  
unc.edu.968143b4-2bc1-4c77-88e7-a907a7cd018c.1213298.rsem.isoforms.normalized\_results  
unc.edu.511d6289-1558-4e90-a77a-05298e15b17c.1390766.rsem.isoforms.normalized\_results  
unc.edu.df755d45-141e-40d1-96c8-6bfe29c17edc.1351625.rsem.isoforms.normalized\_results  
unc.edu.b3797921-4b9a-43c4-8904-6fb80fc80c08.1214096.rsem.isoforms.normalized\_results  
unc.edu.a09bfd63-c31c-461a-b5a4-60670f421233.1352353.rsem.isoforms.normalized\_results  
unc.edu.1afbe0f3-e320-4d74-8648-0c26ddbeab7f.1351296.rsem.isoforms.normalized\_results  
unc.edu.575f9b1e-4952-488a-bbdc-ac98c1f68382.1388352.rsem.isoforms.normalized\_results  
unc.edu.f79008e-fae5-4276-bc25-eae14eb7b7e4.1112024.rsem.isoforms.normalized\_results  
unc.edu.7206d218-0e58-4722-8566-cbcb8b8b4e0.1121177.rsem.isoforms.normalized\_results  
unc.edu.e7925508-8b2f-4c39-bd7a-033e78b1f875.1387987.rsem.isoforms.normalized\_results  
unc.edu.3208f694-4779-4548-8cb4-74df829b3345.1474555.rsem.isoforms.normalized\_results  
unc.edu.3d1b5ffe-38d6-4073-9020-c6897727341c.1113517.rsem.isoforms.normalized\_results  
unc.edu.1cc49a56-ee39-4fd1-bf80-a6b71695c1f1.1228295.rsem.isoforms.normalized\_results  
unc.edu.80e9793f-4e30-45ad-8660-3686685f2db9.1227801.rsem.isoforms.normalized\_results  
unc.edu.4000adba-115e-40bf-afbb-35ad20c4e416.1217948.rsem.isoforms.normalized\_results  
unc.edu.f89742f4-3575-4dd4-860f-ea9ab0321a48.1821708.rsem.isoforms.normalized\_results  
unc.edu.edde0611-3cdb-4f1c-a259-68cb4a905bea.1782310.rsem.isoforms.normalized\_results  
unc.edu.5968c8d3-5f1a-4eb8-8d9b-8bd3fd3fd9f1.1468903.rsem.isoforms.normalized\_results  
unc.edu.159e6f18-943e-4e7b-af13-da273c52dc16.2157534.rsem.isoforms.normalized\_results  
unc.edu.325c6503-12a1-4985-99a0-b968850f9d92.1211517.rsem.isoforms.normalized\_results  
unc.edu.10e3d6b9-8f72-4902-94ca-f89811b98e35.1781760.rsem.isoforms.normalized\_results  
unc.edu.90c55ddf-3ac3-4599-80f6-e29e486d2070.1966528.rsem.isoforms.normalized\_results  
unc.edu.024bc00e-0419-4dc6-8df4-ad3af476314d.1475265.rsem.isoforms.normalized\_results  
unc.edu.06d4cd28-11fb-4f25-8ae0-3fa8e3f3e325.1989602.rsem.isoforms.normalized\_results  
unc.edu.3167baad-cb92-49e6-8a7d-c59f81709a52.2222238.rsem.isoforms.normalized\_results  
unc.edu.538ad820-310d-4463-83a2-44ce1cac920c.2115724.rsem.isoforms.normalized\_results  
unc.edu.d6280a13-a376-4ede-8aab-7a7633cb3b9e.2233431.rsem.isoforms.normalized\_results  
unc.edu.20ca7c4d-7ef0-4fc5-907b-a90fec12a561.1469257.rsem.isoforms.normalized\_results  
unc.edu.36f98bd7-f044-4497-9d19-e25c8e847def.1821818.rsem.isoforms.normalized\_results  
unc.edu.bd1ba628-0cb5-4103-baa4-3f430d24d359.1474894.rsem.isoforms.normalized\_results  
unc.edu.652f8ab9-33b6-4e10-a84e-1e1b1ef0b707.1326775.rsem.isoforms.normalized\_results  
unc.edu.94309b2e-c58c-4e2b-981d-0badb3872db7.2032635.rsem.isoforms.normalized\_results  
unc.edu.2f3c17f6-be91-4195-9aa7-e02298d118f3.1180727.rsem.isoforms.normalized\_results  
unc.edu.3bea01e7-e5bc-484b-91f4-a143caed0aed.1475070.rsem.isoforms.normalized\_results  
unc.edu.36a95ee7-1822-4d07-8110-843792006625.1180018.rsem.isoforms.normalized\_results  
unc.edu.d3cfc6983-3dfc-4533-8809-605c197fc24e.2089346.rsem.isoforms.normalized\_results  
unc.edu.7668e1a3-cf31-411a-8bce-aff592a0f053.1927204.rsem.isoforms.normalized\_results  
unc.edu.b9f76fc8-ca33-46c5-89a0-ae16d42f987f.1114904.rsem.isoforms.normalized\_results  
unc.edu.a56ef438-c2ac-4c6f-9283-59e38ba14f28.1966591.rsem.isoforms.normalized\_results  
unc.edu.c32574a0-5f85-4053-bb98-8472b496975e.1214631.rsem.isoforms.normalized\_results  
unc.edu.69b30673-9ec0-4c05-b75c-12bc1f7268f.2308016.rsem.isoforms.normalized\_results  
unc.edu.b4bb6509-7d67-4d5e-8fd1-624fa373df4d.1474749.rsem.isoforms.normalized\_results  
unc.edu.1b08c8c9-5739-409d-9c9c-3b06ad1f60e6.1215497.rsem.isoforms.normalized\_results  
unc.edu.f873fe6d-9733-48a9-b7e0-23dc50874fbc.2157834.rsem.isoforms.normalized\_results

unc.edu.61b0add8-ad93-4f2a-a95b-fa257934962f.1468793.rsem.isoforms.normalized\_results  
unc.edu.6621636c-4a29-4ad3-99bc-406b1820d063.2089043.rsem.isoforms.normalized\_results  
unc.edu.ad775597-406f-4470-894a-e37d0666761b.1248454.rsem.isoforms.normalized\_results  
unc.edu.221b5d562-e77d-4374-9491-efb5c3b026c3.1783495.rsem.isoforms.normalized\_results  
unc.edu.e356927b-b100-4adf-9935-e4fbf31d1fd3.2315435.rsem.isoforms.normalized\_results  
unc.edu.d1b0c4db-59b7-47ac-b26f-fb14c5aac200.2097134.rsem.isoforms.normalized\_results  
unc.edu.21c8741-963f-463e-ac5b-1c2c1aa9d8cb.1989368.rsem.isoforms.normalized\_results  
unc.edu.433eed62-f9d3-440a-bc04-f0156c70ee65.2167080.rsem.isoforms.normalized\_results  
unc.edu.dbffd0f0-d063-45a2-8cdb-e6ffa6c9e66d.1987864.rsem.isoforms.normalized\_results  
unc.edu.faf18758-485c-4148-87b7-af891f652f48.2096404.rsem.isoforms.normalized\_results  
unc.edu.227c6e50-7801-4fb6-91d3-eda4313024bb.2233605.rsem.isoforms.normalized\_results  
unc.edu.bd5b7c93-fabe-4bb8-a78f-981aed75d79.1783807.rsem.isoforms.normalized\_results  
unc.edu.99471b35-21e6-44cb-863e-d60521a71b31.1966750.rsem.isoforms.normalized\_results  
unc.edu.12c0b9eb-97fc-4fa1-8f64-49c0e3e171a2.1180376.rsem.isoforms.normalized\_results  
unc.edu.eb5b988d-308e-4afb-b21b-8bdd45010c72.1225719.rsem.isoforms.normalized\_results  
unc.edu.70c7f658-5208-4b3f-9767-27a3b06b8ddc.1389051.rsem.isoforms.normalized\_results  
unc.edu.1002d9de-3bd1-4d22-8f2a-64b3114264e0.2032159.rsem.isoforms.normalized\_results  
unc.edu.388f02e0-68bb-4be2-9271-60a42d3a3e9d.1327084.rsem.isoforms.normalized\_results  
unc.edu.535736f-6e19-4fc6-bf3d-a2fb4739c763.2316495.rsem.isoforms.normalized\_results  
unc.edu.7d6ea81b-b8a5-4d3b-aa54-9bf51d8b698b.1476019.rsem.isoforms.normalized\_results  
unc.edu.e68b253d-6149-4c42-a5b3-1ddc2448759b.1784324.rsem.isoforms.normalized\_results  
unc.edu.81018f98-fee6-4cde-b6f6-3b6254e3e8d7.1928138.rsem.isoforms.normalized\_results  
unc.edu.c901511-9e0f-4fc6-b6f4-bee8e627ce25.1469018.rsem.isoforms.normalized\_results  
unc.edu.4c8aa0aa-c1ae-4aff-96f2-4636bb1d5c47.1969083.rsem.isoforms.normalized\_results  
unc.edu.73220a3d-e4e3-4494-a832-86baa98333b4.1784001.rsem.isoforms.normalized\_results  
unc.edu.a66ddf41-6af9-47c0-952b-688aac83c8c8.2097240.rsem.isoforms.normalized\_results  
unc.edu.c40ff5cd-bffa-40c4-a192-9830b0da3daa.1468850.rsem.isoforms.normalized\_results  
unc.edu.5ddb876d-dd32-4f33-89d1-d95e460e1e60.1469231.rsem.isoforms.normalized\_results  
unc.edu.eb210789-9eb4-4def-a83d-3f0254b3c6dd.1228931.rsem.isoforms.normalized\_results  
unc.edu.0aba0f10-05b2-4045-822b-045f61457427.2096018.rsem.isoforms.normalized\_results  
unc.edu.50fd7c3-0e77-4013-ae2b-0e7c70b8d3e3.2095428.rsem.isoforms.normalized\_results  
unc.edu.4c23170b-a5e0-41c8-8309-a5fb2823491.2308975.rsem.isoforms.normalized\_results  
unc.edu.2480ce78-21a7-4717-8b08-8176d9fe6834.2306418.rsem.isoforms.normalized\_results  
unc.edu.2d83d812-8f9b-443b-8643-dd3104b506e8.2306999.rsem.isoforms.normalized\_results  
unc.edu.01a7643f-d7be-40e8-bdc1-562d825e8ba8.2096835.rsem.isoforms.normalized\_results  
unc.edu.c130027b-a3f5-49be-b26d-a0416b7904b5.2306458.rsem.isoforms.normalized\_results  
unc.edu.d74030bf-dfa1-4f65-9596-fd505733139e.1475644.rsem.isoforms.normalized\_results  
unc.edu.8f7b5e84-55c2-4f98-a6a2-56b862161a98.1475149.rsem.isoforms.normalized\_results  
unc.edu.fd93cd6f-ab1c-460c-bfca-268c485a4f5b.1384511.rsem.isoforms.normalized\_results  
unc.edu.2c681223-21a5-4c58-acbb-2d51516bff12.1386366.rsem.isoforms.normalized\_results  
unc.edu.50dd2bb1-e069-42f8-89f4-1e3055adafee.1782706.rsem.isoforms.normalized\_results  
unc.edu.5b0896f2-8fd9-42ee-b56d-b140f8d8657e.1113050.rsem.isoforms.normalized\_results  
unc.edu.b5036d12-d9cc-46a4-b60a-49740310380c.1107947.rsem.isoforms.normalized\_results  
unc.edu.fc2ec949-9292-4709-b0ea-37368add311d.1821548.rsem.isoforms.normalized\_results  
unc.edu.f68894de-6db1-472b-bbda-f1c6e60a818b.1927248.rsem.isoforms.normalized\_results  
unc.edu.d6d7412b-5ec2-413e-a85d-7f765c67afa3.1213748.rsem.isoforms.normalized\_results  
unc.edu.cbc4cdac-a504-47ed-96cf-5c459f7febd0.1821839.rsem.isoforms.normalized\_results  
unc.edu.c87fa518-41c5-417a-88ac-0b300f1a8732.2231970.rsem.isoforms.normalized\_results  
unc.edu.b6ebbe90-feb4-4e8e-9408-031db2297c1c.2157382.rsem.isoforms.normalized\_results  
unc.edu.a5118740-bf71-47e8-a2e3-506792865c90.2090201.rsem.isoforms.normalized\_results  
unc.edu.791a46e8-4d45-4878-b09d-a4f64ce88746.1474973.rsem.isoforms.normalized\_results  
unc.edu.772b8a77-bb90-40a8-ad48-f7a1fc1769de.1347684.rsem.isoforms.normalized\_results  
unc.edu.58e49daa-eced-4ca8-af92-98af61f8b6f1.2039021.rsem.isoforms.normalized\_results  
unc.edu.4e0401b2-6ad4-4709-aa43-f2af0afef259.2095196.rsem.isoforms.normalized\_results  
unc.edu.459468e0-79bc-4544-b168-27a85342d4c1.2236144.rsem.isoforms.normalized\_results  
unc.edu.0c1e7ecc-d20d-4047-8419-6347537cb8a3.1821630.rsem.isoforms.normalized\_results  
unc.edu.38e62ae5-729f-41fa-94e7-7e3caa0a246b.1351677.rsem.isoforms.normalized\_results  
unc.edu.a40c2a50-5627-4fd2-a6a3-2661c4ee5839.1990169.rsem.isoforms.normalized\_results  
unc.edu.e43f2bcb-9ba5-4b65-9042-4d3b06224c0f.1821649.rsem.isoforms.normalized\_results  
unc.edu.429f0e9d-c160-4b36-a31b-dab1097c6129.1388311.rsem.isoforms.normalized\_results  
unc.edu.5eb594ca-ba46-45d2-8532-0fabac564e34.1821986.rsem.isoforms.normalized\_results  
unc.edu.63fcd32-0c58-4541-afbc-96b34020c5c8.1351589.rsem.isoforms.normalized\_results  
unc.edu.83c4827f-742b-42bf-96d0-335b484ee724.1966818.rsem.isoforms.normalized\_results  
unc.edu.5d19bc28-408e-4dc6-bc4b-95b28fa0dddc.2307467.rsem.isoforms.normalized\_results  
unc.edu.6ab37abf-8cc9-4274-bf5c-f08ec3f4d136.2090236.rsem.isoforms.normalized\_results  
unc.edu.febead73-3b12-44e6-8bab-a7cfa7bf1129.1179295.rsem.isoforms.normalized\_results  
unc.edu.68b08ead-5e38-490f-8654-b3db19c80fca.1475048.rsem.isoforms.normalized\_results  
unc.edu.c27a2180-0dec-43ec-bf0f-2cb0acaea022.1821762.rsem.isoforms.normalized\_results  
unc.edu.fee1bb5e-af08-43f5-a313-ebe56ceb6a37.2159042.rsem.isoforms.normalized\_results  
unc.edu.791bcd93-c949-49b3-aaa4-4c8af82f5ec1.2246338.rsem.isoforms.normalized\_results  
unc.edu.f7df4f7f-cd8e-44ba-b16f-203d6049c4fa.1782627.rsem.isoforms.normalized\_results  
unc.edu.4be53c32-b222-44dd-b0b9-6a935591380a.2090034.rsem.isoforms.normalized\_results  
unc.edu.f6b30464-1e34-4b52-baff-544f5fc8f52f.1782936.rsem.isoforms.normalized\_results  
unc.edu.f732f86b-5190-4827-8471-656a43b47681.1475015.rsem.isoforms.normalized\_results  
unc.edu.57eda6ed-26b0-4bf6-98ad-80f4872b9832.1328757.rsem.isoforms.normalized\_results  
unc.edu.eb59f0f9-3b20-4dce-833e-6a67076ddc01.1356427.rsem.isoforms.normalized\_results  
unc.edu.2fdb2cad-53e5-44e4-8b80-ee5801964b20.1112811.rsem.isoforms.normalized\_results  
unc.edu.ad2ee4b7-ec51-4076-bc5b-6601b5abeebc.1475005.rsem.isoforms.normalized\_results  
unc.edu.c7f36dba-a507-46d3-8e68-7f98b8b645e9.1468920.rsem.isoforms.normalized\_results  
unc.edu.ed8b8326-fa77-4e72-b146-49c0543a5792.2306565.rsem.isoforms.normalized\_results  
unc.edu.7773fd96-8ab7-417b-befd-ea63dc596a7a.2032568.rsem.isoforms.normalized\_results  
unc.edu.5e7e3e20-cbfa-476d-bb92-fa3a58207a9b.1113971.rsem.isoforms.normalized\_results

unc.edu.30f1a64e-5df3-4e26-b820-a4254e7e3a7e.2306586.rsem.isoforms.normalized\_results  
unc.edu.ae3c4446-cb58-4b5b-9eb8-6c81e1bf4535.1474941.rsem.isoforms.normalized\_results  
unc.edu.fe6853dd-864f-4257-869f-a425aab32346.2256101.rsem.isoforms.normalized\_results  
unc.edu.3add40ce-6d64-4ded-9ab6-2f076c420dc4.1112696.rsem.isoforms.normalized\_results  
unc.edu.bf7a27d9-35a8-4c59-bf27-e3fa9b271e6e.1475132.rsem.isoforms.normalized\_results  
unc.edu.ee7d92c6-8a20-41ec-8e43-7a7c462b13d5.2032904.rsem.isoforms.normalized\_results  
unc.edu.f1e23b9a-a79f-439c-a4b9-58f9e9899e98.2096608.rsem.isoforms.normalized\_results  
unc.edu.e33ab42a-bfb3-4923-a305-a6babcee61f4.1350228.rsem.isoforms.normalized\_results  
unc.edu.088b27e8-38f6-41ff-a861-d371415fd7f0.2233156.rsem.isoforms.normalized\_results  
unc.edu.6321d37f-3658-447d-96a4-099e8072217a.2306399.rsem.isoforms.normalized\_results  
unc.edu.d22b6ef3-9b08-44d9-b37f-e7f61ce89404.1113722.rsem.isoforms.normalized\_results  
unc.edu.dafc2af2-7b91-45a4-ae67-fe22ab060f06.1475167.rsem.isoforms.normalized\_results  
unc.edu.d692892d-d63b-4ac2-9627-ae255ab17cab.1474926.rsem.isoforms.normalized\_results  
unc.edu.d785b32a-686a-43d6-9e0b-0b63cfd63772.1212370.rsem.isoforms.normalized\_results  
unc.edu.ca10d08d-3cc5-4171-9a70-66dff3c0c3d.1182043.rsem.isoforms.normalized\_results  
unc.edu.029cb0c8-9a67-4af0-9137-a5f9e08fce20.1474870.rsem.isoforms.normalized\_results  
unc.edu.c394bf58-ce01-4ad3-a0f7-f2c5a251356d.2116128.rsem.isoforms.normalized\_results  
unc.edu.518085b3-f993-4346-bb4d-b7244e9435d6.1244669.rsem.isoforms.normalized\_results  
unc.edu.b68f9935-3265-4930-a221-61bc9f8e2eda.2282065.rsem.isoforms.normalized\_results  
unc.edu.b6a8b608-8bf6-4d57-a720-bd4aacd4591.1245475.rsem.isoforms.normalized\_results  
unc.edu.6c392517-fe3d-4d86-8397-c08734fe20cc.1772371.rsem.isoforms.normalized\_results  
unc.edu.8f1bfe41-e48c-4b5d-8b03-8def7666da02.1966931.rsem.isoforms.normalized\_results  
unc.edu.a36865ec-a5fa-4277-a887-325373acadb1.1928598.rsem.isoforms.normalized\_results  
unc.edu.d27207d8-a3cf-475b-963a-e393eef98538.2045790.rsem.isoforms.normalized\_results  
unc.edu.c11e3246-c33d-47ef-b4b4-be287b92d91e.1111951.rsem.isoforms.normalized\_results  
unc.edu.c1ce17a6-3e8b-41b7-97bc-9213b352ce84.2233859.rsem.isoforms.normalized\_results  
unc.edu.b8ecfb28-27d0-4ad4-b73c-cc21be41af31.1226319.rsem.isoforms.normalized\_results  
unc.edu.f154cc00-e118-4d4c-b9d2-2f1f71e0a964.1373741.rsem.isoforms.normalized\_results  
unc.edu.6c390573-7472-441d-956b-9f4747a18f2b.1212880.rsem.isoforms.normalized\_results  
unc.edu.b660dd38-f986-4143-9445-b66cb60f42dd.2166914.rsem.isoforms.normalized\_results  
unc.edu.10efe18b-413b-4e57-b6e2-ce5cd2dbb839.2176809.rsem.isoforms.normalized\_results  
unc.edu.1cd3bf53-27a7-4fda-8501-8270da2b8ceb.1927223.rsem.isoforms.normalized\_results  
unc.edu.91c8d1c3-1afe-4c4c-ae81-7d1f989e0139.1225980.rsem.isoforms.normalized\_results  
unc.edu.e9acf520-2eb5-4b29-84c8-10ae6c5919e7.1989250.rsem.isoforms.normalized\_results  
unc.edu.5676c0ee-c460-492c-bf00-73d5ddb1d647.1468866.rsem.isoforms.normalized\_results  
unc.edu.66132b23-e10a-49d9-89c5-129d7d98c17b.1474640.rsem.isoforms.normalized\_results  
unc.edu.dfc4aacd-32b1-4cf8-91f9-3c865cf56ec9.1179832.rsem.isoforms.normalized\_results  
unc.edu.dfffb9c-c83a-4087-a3f7-2be3d63a2eaa.2254656.rsem.isoforms.normalized\_results  
unc.edu.ea9d4bd8-1f4e-4ad5-81f7-803b078f2603.1468934.rsem.isoforms.normalized\_results  
unc.edu.fdf7fac82-d8e3-4133-be0e-ec5b2badc5d1.2306303.rsem.isoforms.normalized\_results  
unc.edu.168e440a-b356-45c7-849c-43823703417e.2032107.rsem.isoforms.normalized\_results  
unc.edu.22e154de-0e3b-443b-8420-48d68d6c1ce4.1179561.rsem.isoforms.normalized\_results  
unc.edu.381b51af-d1f7-41db-a69e-49d681b3ef39.1114412.rsem.isoforms.normalized\_results  
unc.edu.ccc64615-07c6-4e49-8e59-afb97d37464f.1112300.rsem.isoforms.normalized\_results  
unc.edu.72ea067a-e5ae-43f3-97b8-2283b35df8d6.1987767.rsem.isoforms.normalized\_results  
unc.edu.b1984010-7ef5-4df4-abfc-d18502cf124c.1179032.rsem.isoforms.normalized\_results  
unc.edu.3c499f07-67e2-4032-a0b5-b9edd90035f7.1179259.rsem.isoforms.normalized\_results  
unc.edu.7e8935da-773b-4337-8fa2-f52ebbaceaae.2159073.rsem.isoforms.normalized\_results  
unc.edu.043d2756-1abf-411f-aaac-b448ed088be1.1929154.rsem.isoforms.normalized\_results  
unc.edu.b290727b-23ed-4e73-9071-cf2c06671430.1469040.rsem.isoforms.normalized\_results  
unc.edu.f3872d71-1889-4756-bdb4-d5ae383758a8.1385605.rsem.isoforms.normalized\_results  
unc.edu.037904cf-92c3-443c-8800-0156db1e3a89.1112964.rsem.isoforms.normalized\_results  
unc.edu.8c79f5ec-ce4f-4c86-8d1c-71495c276d74.1798459.rsem.isoforms.normalized\_results  
unc.edu.0fa20811-219b-4d76-a8f6-d838e4de093e.1929317.rsem.isoforms.normalized\_results  
unc.edu.d31897c3-5d0a-4104-bdc6-4b12eb061c2a.2316197.rsem.isoforms.normalized\_results  
unc.edu.6491f391-9704-4249-bc81-d712e755ec74.1110655.rsem.isoforms.normalized\_results  
unc.edu.bc993392-5f2f-4cb8-8d27-26f3df2b3583.1214137.rsem.isoforms.normalized\_results  
unc.edu.3833acbb-2ea2-4442-90af-6b009ae2543b.2235558.rsem.isoforms.normalized\_results  
unc.edu.b8afe780-f680-40db-a941-e984660ff90c.1469133.rsem.isoforms.normalized\_results  
unc.edu.42db28fc-4d5f-4b0f-aa86-7d27197c7649.1386234.rsem.isoforms.normalized\_results  
unc.edu.3cefc0b-796f-4ef0-b50d-a6ed17e9be4d.1179777.rsem.isoforms.normalized\_results  
unc.edu.94447759-c20c-49f5-b51f-cbfdea41f2e8.1121022.rsem.isoforms.normalized\_results  
unc.edu.58382a39-eb95-4cd0-ad04-48c6da4b4a56.1348868.rsem.isoforms.normalized\_results  
unc.edu.bb0c2732-5fb4-44e7-bc62-a645cf1c1a56.1385181.rsem.isoforms.normalized\_results  
unc.edu.41836f0e-f807-4afa-ae39-c0eb16fa6b54.1474957.rsem.isoforms.normalized\_results  
unc.edu.4a0b6e3c-a167-4ca6-876b-6fb82fa8fdb6.2115956.rsem.isoforms.normalized\_results  
unc.edu.e71db8e9-8ee2-46dc-935a-3274f1fab863.2234031.rsem.isoforms.normalized\_results  
unc.edu.6aec2686-fcea-4d3e-8311-0b6ccad4c000.1469245.rsem.isoforms.normalized\_results  
unc.edu.6f3cb879-cf6d-4347-8aae-b6a6ee7a4274.1349325.rsem.isoforms.normalized\_results  
unc.edu.b7290db7-112b-494e-80f7-bb05860f6c7e.2158295.rsem.isoforms.normalized\_results  
unc.edu.c4fbd136-4227-4792-ac53-8c887aa6ab1a.1474622.rsem.isoforms.normalized\_results  
unc.edu.80cdd385-2a6a-4d59-81c7-f36786637323.1179666.rsem.isoforms.normalized\_results  
unc.edu.92e94724-a03e-4b58-91b2-f309ab8dc943.2157870.rsem.isoforms.normalized\_results  
unc.edu.9a7e2ecf-3470-427e-93cd-8461a3a3a5b8.1385817.rsem.isoforms.normalized\_results  
unc.edu.8f482c29-37fe-400f-b178-224765a0c037.1841691.rsem.isoforms.normalized\_results  
unc.edu.312ea080-3831-453d-aa8c-e466192c8309.1247529.rsem.isoforms.normalized\_results  
unc.edu.3458d1fe-d159-4522-a627-70c5cc180daa.1228164.rsem.isoforms.normalized\_results  
unc.edu.2bc311e-59cc-449f-b8dc-6662052678fd.1179061.rsem.isoforms.normalized\_results  
unc.edu.80b2573f-d8e0-4d0d-84a6-301c5103267d.1469202.rsem.isoforms.normalized\_results  
unc.edu.80d8bbcb-11ff-469a-96ec-a72e0e2ec9c4.1475105.rsem.isoforms.normalized\_results

SNOWS\_p\_TCGA\_Batch\_309\_310\_NSP\_GenomeWideSNP\_6\_A06\_1362050  
WHIPS\_p\_1TCGA\_220\_235\_N\_GenomeWideSNP\_6\_E11\_1230920  
WHIPS\_p\_1TCGA\_220\_235\_N\_GenomeWideSNP\_6\_H01\_1230950  
HORNS\_p\_TCGA\_b110\_113\_SNP\_N\_GenomeWideSNP\_6\_A09\_772252  
WAXEN\_p\_TCGA\_252\_253\_N\_GenomeWideSNP\_6\_B06\_1270710  
ENDUE\_p\_TCGA\_271\_76\_79\_280\_81\_N\_GenomeWideSNP\_6\_D04\_1346856  
FRUIT\_p\_TCGAb\_327\_328\_329\_NSP\_GenomeWideSNP\_6\_D10\_1367932  
FOXED\_p\_TCGA\_b122\_128\_SNP\_N\_GenomeWideSNP\_6\_F03\_781824  
SNOWS\_p\_TCGA\_Batch\_309\_310\_NSP\_GenomeWideSNP\_6\_B04\_1362052  
WAXEN\_p\_TCGA\_252\_253\_N\_GenomeWideSNP\_6\_A12\_1270610  
WAXEN\_p\_TCGA\_252\_253\_N\_GenomeWideSNP\_6\_B10\_1270600  
CODON\_p\_TCGA\_293\_294\_295\_N\_GenomeWideSNP\_6\_H01\_1343650  
AVISO\_p\_4TCGA\_242\_238\_250\_mN\_GenomeWideSNP\_6\_A11\_1231488  
CONGA\_p\_TCGA\_b\_317\_318\_319\_NSP\_GenomeWideSNP\_6\_C02\_1365210  
AMAZE\_p\_TCGASNP\_b86\_87\_88\_N\_GenomeWideSNP\_6\_H02\_735486  
CONGA\_p\_TCGA\_b\_317\_318\_319\_NSP\_GenomeWideSNP\_6\_A10\_1365246  
CODON\_p\_TCGA\_293\_294\_295\_N\_GenomeWideSNP\_6\_E09\_1343612  
WHIPS\_p\_1TCGA\_220\_235\_N\_GenomeWideSNP\_6\_F05\_1230986  
ENDUE\_p\_TCGA\_271\_76\_79\_280\_81\_N\_GenomeWideSNP\_6\_B04\_1346730  
OKRAS\_p\_TCGA\_198\_199\_200\_SNP\_N\_GenomeWideSNP\_6\_F11\_955304  
OKRAS\_p\_TCGA\_198\_199\_200\_SNP\_N\_GenomeWideSNP\_6\_G10\_955454  
TYPED\_p\_TCGA\_188\_192\_Mirn\_SNP\_N\_GenomeWideSNP\_6\_B08\_913832  
TYPED\_p\_TCGA\_188\_192\_Mirn\_SNP\_N\_GenomeWideSNP\_6\_B09\_913896  
WAXEN\_p\_TCGA\_252\_253\_N\_GenomeWideSNP\_6\_C06\_1270620  
LOLLS\_p\_TCGASNP\_223\_225\_N\_GenomeWideSNP\_6\_H07\_1152008  
CODON\_p\_TCGA\_293\_294\_295\_N\_GenomeWideSNP\_6\_E02\_1343674  
ENDUE\_p\_TCGA\_271\_76\_79\_280\_81\_N\_GenomeWideSNP\_6\_D03\_1346864  
AVISO\_p\_4TCGA\_242\_238\_250\_mN\_GenomeWideSNP\_6\_A04\_1231534  
FRUIT\_p\_TCGAb\_327\_328\_329\_NSP\_GenomeWideSNP\_6\_E04\_1367920  
FOXED\_p\_TCGA\_b122\_128\_SNP\_N\_GenomeWideSNP\_6\_G03\_781782  
COPAL\_p\_TCGAb\_337\_338\_339\_NSP\_GenomeWideSNP\_6\_A09\_1373638  
AMAZE\_p\_TCGASNP\_b86\_87\_88\_N\_GenomeWideSNP\_6\_D02\_735530  
WHIRR\_p\_TCGA\_168\_169\_170\_redo\_N\_GenomeWideSNP\_6\_A08\_845278  
COPAL\_p\_TCGAb\_337\_338\_339\_NSP\_GenomeWideSNP\_6\_A11\_1373690  
AMAZE\_p\_TCGASNP\_b86\_87\_88\_N\_GenomeWideSNP\_6\_C09\_735556  
AMAZE\_p\_TCGASNP\_b86\_87\_88\_N\_GenomeWideSNP\_6\_E09\_735456  
COPAL\_p\_TCGAb\_337\_338\_339\_NSP\_GenomeWideSNP\_6\_B08\_1373704  
BISON\_p\_TCGA\_164\_173\_175\_SNP\_N\_GenomeWideSNP\_6\_F08\_863276  
CONGA\_p\_TCGA\_b\_317\_318\_319\_NSP\_GenomeWideSNP\_6\_B12\_1365186  
WHIPS\_p\_1TCGA\_220\_235\_N\_GenomeWideSNP\_6\_F07\_1230886  
WHIRR\_p\_TCGA\_168\_169\_170\_redo\_N\_GenomeWideSNP\_6\_C05\_845156  
OKRAS\_p\_TCGA\_198\_199\_200\_SNP\_N\_GenomeWideSNP\_6\_G01\_955444  
SNOWS\_p\_TCGA\_Batch\_309\_310\_NSP\_GenomeWideSNP\_6\_C02\_1362012  
BISON\_p\_TCGA\_164\_173\_175\_SNP\_N\_GenomeWideSNP\_6\_H02\_863238  
FOXED\_p\_TCGA\_b122\_128\_SNP\_N\_GenomeWideSNP\_6\_G04\_781802  
WAXEN\_p\_TCGA\_252\_253\_N\_GenomeWideSNP\_6\_B05\_1270718  
SNOWS\_p\_TCGA\_Batch\_309\_310\_NSP\_GenomeWideSNP\_6\_C04\_1362056  
HORNS\_p\_TCGA\_b110\_113\_SNP\_N\_GenomeWideSNP\_6\_A04\_772348  
FRUIT\_p\_TCGAb\_327\_328\_329\_NSP\_GenomeWideSNP\_6\_E10\_1367966  
OKRAS\_p\_TCGA\_198\_199\_200\_SNP\_N\_GenomeWideSNP\_6\_D02\_955420  
OKRAS\_p\_TCGA\_198\_199\_200\_SNP\_N\_GenomeWideSNP\_6\_C10\_955466  
HORNS\_p\_TCGA\_b110\_113\_SNP\_N\_GenomeWideSNP\_6\_A02\_772344  
WHIPS\_p\_1TCGA\_220\_235\_N\_GenomeWideSNP\_6\_G07\_1230992  
AMAZE\_p\_TCGASNP\_b86\_87\_88\_N\_GenomeWideSNP\_6\_C11\_735468  
FOXED\_p\_TCGA\_b122\_128\_SNP\_N\_GenomeWideSNP\_6\_F11\_781866  
AMAZE\_p\_TCGASNP\_b86\_87\_88\_N\_GenomeWideSNP\_6\_F05\_735440  
BISON\_p\_TCGA\_164\_173\_175\_SNP\_N\_GenomeWideSNP\_6\_F09\_863298  
WHIPS\_p\_1TCGA\_220\_235\_N\_GenomeWideSNP\_6\_F06\_1230930  
XYLEM\_p\_TCGASNP\_207\_212\_N\_GenomeWideSNP\_6\_E04\_1051190  
GLIAS\_p\_TCGA\_204\_205\_206\_207\_N\_GenomeWideSNP\_6\_E10\_1051830  
DLP\_REDO\_FROM\_CONGA\_B03  
FRUIT\_p\_TCGAb\_327\_328\_329\_NSP\_GenomeWideSNP\_6\_E06\_1367852  
SNOWS\_p\_TCGA\_Batch\_309\_310\_NSP\_GenomeWideSNP\_6\_B12\_1362068  
CODON\_p\_TCGA\_293\_294\_295\_N\_GenomeWideSNP\_6\_F05\_1343540  
COPAL\_p\_TCGAb\_337\_338\_339\_NSP\_GenomeWideSNP\_6\_B06\_1373642  
GLIAS\_p\_TCGA\_204\_205\_206\_207\_N\_GenomeWideSNP\_6\_E01\_1051786  
ENDUE\_p\_TCGA\_271\_76\_79\_280\_81\_N\_GenomeWideSNP\_6\_E05\_1346908  
SNOWS\_p\_TCGA\_Batch\_309\_310\_NSP\_GenomeWideSNP\_6\_B06\_1362010  
AVISO\_p\_4TCGA\_242\_238\_250\_mN\_GenomeWideSNP\_6\_A12\_1231568  
SNOWS\_p\_TCGA\_Batch\_309\_310\_NSP\_GenomeWideSNP\_6\_B10\_1362078  
XYLEM\_p\_TCGASNP\_207\_212\_N\_GenomeWideSNP\_6\_B08\_1051166  
BISON\_p\_TCGA\_164\_173\_175\_SNP\_N\_GenomeWideSNP\_6\_C11\_863354  
COPAL\_p\_TCGAb\_337\_338\_339\_NSP\_GenomeWideSNP\_6\_C12\_1373596  
SNOWS\_p\_TCGA\_Batch\_309\_310\_NSP\_GenomeWideSNP\_6\_C09\_1362008  
LOLLS\_p\_TCGASNP\_223\_225\_N\_GenomeWideSNP\_6\_H04\_1151988  
XYLEM\_p\_TCGASNP\_207\_212\_N\_GenomeWideSNP\_6\_E05\_1051216  
CODON\_p\_TCGA\_293\_294\_295\_N\_GenomeWideSNP\_6\_G07\_1343692  
OKRAS\_p\_TCGA\_198\_199\_200\_SNP\_N\_GenomeWideSNP\_6\_D01\_955342  
OKRAS\_p\_TCGA\_198\_199\_200\_SNP\_N\_GenomeWideSNP\_6\_D07\_955430  
CODON\_p\_TCGA\_293\_294\_295\_N\_GenomeWideSNP\_6\_D05\_1343632  
BASIC\_p\_TCGASNP\_219\_221\_223\_N\_GenomeWideSNP\_6\_D02\_1148644  
HORNS\_p\_TCGA\_b110\_113\_SNP\_N\_GenomeWideSNP\_6\_C04\_772308

COPAL\_p\_TCGAb\_337\_338\_339\_NSP\_GenomeWideSNP\_6\_A03\_1373684  
LOLLS\_p\_TCGASNP\_223\_225\_N\_GenomeWideSNP\_6\_B10\_1151972  
HORNS\_p\_TCGA\_b110\_113\_SNP\_N\_GenomeWideSNP\_6\_B12\_772400  
WAXEN\_p\_TCGA\_252\_253\_N\_GenomeWideSNP\_6\_B09\_1270730  
LOLLS\_p\_TCGASNP\_223\_225\_N\_GenomeWideSNP\_6\_F04\_1152004  
COPAL\_p\_TCGAb\_337\_338\_339\_NSP\_GenomeWideSNP\_6\_B01\_1373628  
OKRAS\_p\_TCGA\_198\_199\_200\_SNP\_N\_GenomeWideSNP\_6\_A11\_955478  
HORNS\_p\_TCGA\_b110\_113\_SNP\_N\_GenomeWideSNP\_6\_D10\_772298  
OKRAS\_p\_TCGA\_198\_199\_200\_SNP\_N\_GenomeWideSNP\_6\_F05\_955438  
WHIPS\_p\_1TCGA\_220\_235\_N\_GenomeWideSNP\_6\_G01\_1231006  
CODON\_p\_TCGA\_293\_294\_295\_N\_GenomeWideSNP\_6\_E10\_1343560  
WHIPS\_p\_1TCGA\_220\_235\_N\_GenomeWideSNP\_6\_E03\_1231040  
COPAL\_p\_TCGAb\_337\_338\_339\_NSP\_GenomeWideSNP\_6\_C06\_1373730  
DLP\_REDO\_FROM\_CODON\_E01  
WHIPS\_p\_1TCGA\_220\_235\_N\_GenomeWideSNP\_6\_D11\_1230932  
WHIRR\_p\_TCGA\_168\_169\_170\_redo\_N\_GenomeWideSNP\_6\_A07\_845096  
AVISO\_p\_4TCGA\_242\_238\_250\_mN\_GenomeWideSNP\_6\_A08\_1231504  
OKRAS\_p\_TCGA\_198\_199\_200\_SNP\_N\_GenomeWideSNP\_6\_H03\_955388  
XYLEM\_p\_TCGASNP\_207\_212\_N\_GenomeWideSNP\_6\_G06\_1051242  
HORNS\_p\_TCGA\_b110\_113\_SNP\_N\_GenomeWideSNP\_6\_B10\_772410  
ENDUE\_p\_TCGA\_271\_76\_79\_280\_81\_N\_GenomeWideSNP\_6\_E04\_1346828  
AVISO\_p\_4TCGA\_242\_238\_250\_mN\_GenomeWideSNP\_6\_A06\_1231506  
CONGA\_p\_TCGA\_b\_317\_318\_319\_NSP\_GenomeWideSNP\_6\_B10\_1365172  
WAXEN\_p\_TCGA\_252\_253\_N\_GenomeWideSNP\_6\_B01\_1270602  
OKRAS\_p\_TCGA\_198\_199\_200\_SNP\_N\_GenomeWideSNP\_6\_A09\_955332  
CODON\_p\_TCGA\_293\_294\_295\_N\_GenomeWideSNP\_6\_D06\_1343660  
WHIPS\_p\_1TCGA\_220\_235\_N\_GenomeWideSNP\_6\_H06\_1230924  
FRUIT\_p\_TCGAb\_327\_328\_329\_NSP\_GenomeWideSNP\_6\_D04\_1367994  
WHIPS\_p\_1TCGA\_220\_235\_N\_GenomeWideSNP\_6\_E05\_1231008  
CONGA\_p\_TCGA\_b\_317\_318\_319\_NSP\_GenomeWideSNP\_6\_B08\_1365270  
COPAL\_p\_TCGAb\_337\_338\_339\_NSP\_GenomeWideSNP\_6\_B12\_1373736  
LOLLS\_p\_TCGASNP\_223\_225\_N\_GenomeWideSNP\_6\_C07\_1152044  
FOXED\_p\_TCGA\_b122\_128\_SNP\_N\_GenomeWideSNP\_6\_F08\_781776  
RUNIC\_p\_2TCGA235\_237\_250\_242\_mN\_GenomeWideSNP\_6\_A01\_1231086  
TYPED\_p\_TCGA\_188\_192\_Mirrn\_SNP\_N\_GenomeWideSNP\_6\_D04\_913826  
WAXEN\_p\_TCGA\_252\_253\_N\_GenomeWideSNP\_6\_A08\_1270664  
ENDUE\_p\_TCGA\_271\_76\_79\_280\_81\_N\_GenomeWideSNP\_6\_G04\_1346752  
COPAL\_p\_TCGAb\_337\_338\_339\_NSP\_GenomeWideSNP\_6\_B10\_1373668  
AVISO\_p\_4TCGA\_242\_238\_250\_mN\_GenomeWideSNP\_6\_A10\_1231472  
ENDUE\_p\_TCGA\_271\_76\_79\_280\_81\_N\_GenomeWideSNP\_6\_A04\_1346840  
AMAZE\_p\_TCGASNP\_b86\_87\_88\_N\_GenomeWideSNP\_6\_A11\_735446  
WHIPS\_p\_1TCGA\_220\_235\_N\_GenomeWideSNP\_6\_E06\_1231034  
ENDUE\_p\_TCGA\_271\_76\_79\_280\_81\_N\_GenomeWideSNP\_6\_C05\_1346858  
WHIRR\_p\_TCGA\_168\_169\_170\_redo\_N\_GenomeWideSNP\_6\_C02\_845262  
CONGA\_p\_TCGA\_b\_317\_318\_319\_NSP\_GenomeWideSNP\_6\_A04\_1365272  
CODON\_p\_TCGA\_293\_294\_295\_N\_GenomeWideSNP\_6\_G06\_1343670  
HORNS\_p\_TCGA\_b110\_113\_SNP\_N\_GenomeWideSNP\_6\_A05\_772296  
AMAZE\_p\_TCGASNP\_b86\_87\_88\_N\_GenomeWideSNP\_6\_C08\_735516  
WHIRR\_p\_TCGA\_168\_169\_170\_redo\_N\_GenomeWideSNP\_6\_C10\_845098  
ENDUE\_p\_TCGA\_271\_76\_79\_280\_81\_N\_GenomeWideSNP\_6\_A05\_1346796  
XYLEM\_p\_TCGASNP\_207\_212\_N\_GenomeWideSNP\_6\_E02\_1051158  
WHIPS\_p\_1TCGA\_220\_235\_N\_GenomeWideSNP\_6\_G06\_1230994  
OKRAS\_p\_TCGA\_198\_199\_200\_SNP\_N\_GenomeWideSNP\_6\_D05\_955386  
WAXEN\_p\_TCGA\_252\_253\_N\_GenomeWideSNP\_6\_C02\_1270572  
ENDUE\_p\_TCGA\_271\_76\_79\_280\_81\_N\_GenomeWideSNP\_6\_E03\_1346846  
OKRAS\_p\_TCGA\_198\_199\_200\_SNP\_N\_GenomeWideSNP\_6\_G02\_955376  
CODON\_p\_TCGA\_293\_294\_295\_N\_GenomeWideSNP\_6\_F12\_1343606  
ENDUE\_p\_TCGA\_271\_76\_79\_280\_81\_N\_GenomeWideSNP\_6\_B05\_1346898  
SNOWS\_p\_TCGA\_Batch\_309\_310\_NSP\_GenomeWideSNP\_6\_A10\_1361998  
SNOWS\_p\_TCGA\_Batch\_309\_310\_NSP\_GenomeWideSNP\_6\_C07\_1362144  
SNOWS\_p\_TCGA\_Batch\_309\_310\_NSP\_GenomeWideSNP\_6\_A04\_1362132  
WHIPS\_p\_1TCGA\_220\_235\_N\_GenomeWideSNP\_6\_F01\_1230902  
BISON\_p\_TCGA\_164\_173\_175\_SNP\_N\_GenomeWideSNP\_6\_H04\_863300  
WHIPS\_p\_1TCGA\_220\_235\_N\_GenomeWideSNP\_6\_E12\_1230956  
AMAZE\_p\_TCGASNP\_b86\_87\_88\_N\_GenomeWideSNP\_6\_F02\_735478  
BASIC\_p\_TCGASNP\_219\_221\_223\_N\_GenomeWideSNP\_6\_F04\_1148722  
WRIED\_p\_TCGA\_143\_147\_150\_Hahn\_N\_GenomeWideSNP\_6\_D03\_800004  
WHIPS\_p\_1TCGA\_220\_235\_N\_GenomeWideSNP\_6\_G12\_1230882  
HORNS\_p\_TCGA\_b110\_113\_SNP\_N\_GenomeWideSNP\_6\_E01\_772322  
CONGA\_p\_TCGA\_b\_317\_318\_319\_NSP\_GenomeWideSNP\_6\_A12\_1365192  
OKRAS\_p\_TCGA\_198\_199\_200\_SNP\_N\_GenomeWideSNP\_6\_E12\_955440  
BISON\_p\_TCGA\_164\_173\_175\_SNP\_N\_GenomeWideSNP\_6\_H12\_863324  
CONGA\_p\_TCGA\_b\_317\_318\_319\_NSP\_GenomeWideSNP\_6\_A02\_1365296  
CONGA\_p\_TCGA\_b\_317\_318\_319\_NSP\_GenomeWideSNP\_6\_A06\_1365314  
WHIPS\_p\_1TCGA\_220\_235\_N\_GenomeWideSNP\_6\_D10\_1231016  
WHIRR\_p\_TCGA\_168\_169\_170\_redo\_N\_GenomeWideSNP\_6\_C03\_845100  
HORNS\_p\_TCGA\_b110\_113\_SNP\_N\_GenomeWideSNP\_6\_D11\_772290  
XYLEM\_p\_TCGASNP\_207\_212\_N\_GenomeWideSNP\_6\_B06\_1051308  
BISON\_p\_TCGA\_164\_173\_175\_SNP\_N\_GenomeWideSNP\_6\_H11\_863386  
WHIPS\_p\_1TCGA\_220\_235\_N\_GenomeWideSNP\_6\_F12\_1231012  
ENDUE\_p\_TCGA\_271\_76\_79\_280\_81\_N\_GenomeWideSNP\_6\_F04\_1346904  
AVISO\_p\_4TCGA\_242\_238\_250\_mN\_GenomeWideSNP\_6\_A02\_1231630

RUNIC\_p\_2TCGA235\_237\_250\_242\_mN\_GenomeWideSNP\_6\_A04\_1231116  
OKRAS\_p\_TCGA\_198\_199\_200\_SNP\_N\_GenomeWideSNP\_6\_C11\_955468  
HORNS\_p\_TCGA\_b110\_113\_SNP\_N\_GenomeWideSNP\_6\_B08\_772304  
COPAL\_p\_TCGAb\_337\_338\_339\_NSP\_GenomeWideSNP\_6\_B02\_1373644  
FRUIT\_p\_TCGAb\_327\_328\_329\_NSP\_GenomeWideSNP\_6\_E02\_1367874  
HORNS\_p\_TCGA\_b110\_113\_SNP\_N\_GenomeWideSNP\_6\_A06\_772372  
WAXEN\_p\_TCGA\_252\_253\_N\_GenomeWideSNP\_6\_A07\_1270578  
TYPED\_p\_TCGA\_188\_192\_Mirn\_SNP\_N\_GenomeWideSNP\_6\_C12\_913854  
SNOWS\_p\_TCGA\_Batch\_309\_310\_NSP\_GenomeWideSNP\_6\_C11\_1362150  
WHIPS\_p\_1TCGA\_220\_235\_N\_GenomeWideSNP\_6\_D09\_1230954  
WHIPS\_p\_1TCGA\_220\_235\_N\_GenomeWideSNP\_6\_G05\_1231046  
LOLLS\_p\_TCGASNP\_223\_225\_N\_GenomeWideSNP\_6\_G09\_1152018  
FRUIT\_p\_TCGAb\_327\_328\_329\_NSP\_GenomeWideSNP\_6\_D06\_1367872  
COPAL\_p\_TCGAb\_337\_338\_339\_NSP\_GenomeWideSNP\_6\_B05\_1373572  
FOXED\_p\_TCGA\_b122\_128\_SNP\_N\_GenomeWideSNP\_6\_D11\_781766  
WAXEN\_p\_TCGA\_252\_253\_N\_GenomeWideSNP\_6\_A03\_1270714  
AMAZE\_p\_TCGASNP\_b86\_87\_88\_N\_GenomeWideSNP\_6\_E11\_735426  
FOXED\_p\_TCGA\_b122\_128\_SNP\_N\_GenomeWideSNP\_6\_F05\_781904  
SNOWS\_p\_TCGA\_Batch\_309\_310\_NSP\_GenomeWideSNP\_6\_A08\_1362082  
HORNS\_p\_TCGA\_b110\_113\_SNP\_N\_GenomeWideSNP\_6\_E04\_772238  
CODON\_p\_TCGA\_293\_294\_295\_N\_GenomeWideSNP\_6\_F06\_1343648  
COPAL\_p\_TCGAb\_337\_338\_339\_NSP\_GenomeWideSNP\_6\_C03\_1373560  
CODON\_p\_TCGA\_293\_294\_295\_N\_GenomeWideSNP\_6\_G01\_1343702  
FRUIT\_p\_TCGAb\_327\_328\_329\_NSP\_GenomeWideSNP\_6\_E08\_1367830  
SNOWS\_p\_TCGA\_Batch\_309\_310\_NSP\_GenomeWideSNP\_6\_B08\_1362054  
WHIPS\_p\_1TCGA\_220\_235\_N\_GenomeWideSNP\_6\_E04\_1230880  
WRIED\_p\_TCGA\_143\_147\_150\_Hahn\_N\_GenomeWideSNP\_6\_H07\_799908  
WHIPS\_p\_1TCGA\_220\_235\_N\_GenomeWideSNP\_6\_F11\_1231022  
WRIED\_p\_TCGA\_143\_147\_150\_Hahn\_N\_GenomeWideSNP\_6\_F06\_799978  
LOLLS\_p\_TCGASNP\_223\_225\_N\_GenomeWideSNP\_6\_F05\_1151894  
WHIPS\_p\_1TCGA\_220\_235\_N\_GenomeWideSNP\_6\_H07\_1231050  
ENDUE\_p\_TCGA\_271\_76\_79\_280\_81\_N\_GenomeWideSNP\_6\_G03\_1346830  
LOLLS\_p\_TCGASNP\_223\_225\_N\_GenomeWideSNP\_6\_C05\_1151902  
OKRAS\_p\_TCGA\_198\_199\_200\_SNP\_N\_GenomeWideSNP\_6\_C06\_955368  
FOXED\_p\_TCGA\_b122\_128\_SNP\_N\_GenomeWideSNP\_6\_F12\_781758  
FRUIT\_p\_TCGAb\_327\_328\_329\_NSP\_GenomeWideSNP\_6\_D02\_1367886  
OKRAS\_p\_TCGA\_198\_199\_200\_SNP\_N\_GenomeWideSNP\_6\_F03\_955462  
COPAL\_p\_TCGAb\_337\_338\_339\_NSP\_GenomeWideSNP\_6\_C05\_1373674  
WAXEN\_p\_TCGA\_252\_253\_N\_GenomeWideSNP\_6\_C05\_1270692  
AVISO\_p\_4TCGA\_242\_238\_250\_mN\_GenomeWideSNP\_6\_A09\_1231536  
FRUIT\_p\_TCGAb\_327\_328\_329\_NSP\_GenomeWideSNP\_6\_D12\_1367864  
XYLEM\_p\_TCGASNP\_207\_212\_N\_GenomeWideSNP\_6\_B04\_1051198  
ENDUE\_p\_TCGA\_271\_76\_79\_280\_81\_N\_GenomeWideSNP\_6\_D05\_1346754  
LOLLS\_p\_TCGASNP\_223\_225\_N\_GenomeWideSNP\_6\_C06\_1152032  
TYPED\_p\_TCGA\_188\_192\_Mirn\_SNP\_N\_GenomeWideSNP\_6\_C11\_913922  
OKRAS\_p\_TCGA\_198\_199\_200\_SNP\_N\_GenomeWideSNP\_6\_C08\_955374  
WHIRR\_p\_TCGA\_168\_169\_170\_redo\_N\_GenomeWideSNP\_6\_C08\_845224  
COPAL\_p\_TCGAb\_337\_338\_339\_NSP\_GenomeWideSNP\_6\_C10\_1373566  
AVISO\_p\_4TCGA\_242\_238\_250\_mN\_GenomeWideSNP\_6\_A05\_1231574  
CODON\_p\_TCGA\_293\_294\_295\_N\_GenomeWideSNP\_6\_G12\_1343642  
OKRAS\_p\_TCGA\_198\_199\_200\_SNP\_N\_GenomeWideSNP\_6\_F10\_955324  
SNOWS\_p\_TCGA\_Batch\_309\_310\_NSP\_GenomeWideSNP\_6\_A12\_1362074  
XYLEM\_p\_TCGASNP\_207\_212\_N\_GenomeWideSNP\_6\_A06\_1051212  
COPAL\_p\_TCGAb\_337\_338\_339\_NSP\_GenomeWideSNP\_6\_A04\_1373568  
WAXEN\_p\_TCGA\_252\_253\_N\_GenomeWideSNP\_6\_A04\_1270742  
AVISO\_p\_4TCGA\_242\_238\_250\_mN\_GenomeWideSNP\_6\_A03\_1231578  
WHIPS\_p\_1TCGA\_220\_235\_N\_GenomeWideSNP\_6\_H02\_1230922  
AVISO\_p\_4TCGA\_242\_238\_250\_mN\_GenomeWideSNP\_6\_A07\_1231484  
CONGA\_p\_TCGA\_b\_317\_318\_319\_NSP\_GenomeWideSNP\_6\_B06\_1365250  
WAXEN\_p\_TCGA\_252\_253\_N\_GenomeWideSNP\_6\_A11\_1270596  
SNOWS\_p\_TCGA\_Batch\_309\_310\_NSP\_GenomeWideSNP\_6\_B02\_1362062  
COPAL\_p\_TCGAb\_337\_338\_339\_NSP\_GenomeWideSNP\_6\_C08\_1373618  
WHIRR\_p\_TCGA\_168\_169\_170\_redo\_N\_GenomeWideSNP\_6\_C12\_845256  
WAXEN\_p\_TCGA\_252\_253\_N\_GenomeWideSNP\_6\_C01\_1270618  
HORNS\_p\_TCGA\_b110\_113\_SNP\_N\_GenomeWideSNP\_6\_F07\_772336  
COPAL\_p\_TCGAb\_337\_338\_339\_NSP\_GenomeWideSNP\_6\_A07\_1373574  
XYLEM\_p\_TCGASNP\_207\_212\_N\_GenomeWideSNP\_6\_E01\_1051160  
FRUIT\_p\_TCGAb\_327\_328\_329\_NSP\_GenomeWideSNP\_6\_D08\_1367900  
FOXED\_p\_TCGA\_b122\_128\_SNP\_N\_GenomeWideSNP\_6\_D10\_781864  
CONGA\_p\_TCGA\_b\_317\_318\_319\_NSP\_GenomeWideSNP\_6\_A08\_1365346

Supplemental table 6

Sample annotations for all tumors included in Aine et al.

Gene mutations (m) indicated as 0 (WT) and 1 (Mutant)  
 Gene copy-number status (cna) indicated as -2 (deletion), -1 (loss), 0 (Neutral), 1 (gain) and 2 (amplification)  
 Centroids with NA correlations were calculated using Pearson correlation  
 Cells with NA indicate that the sample was not included in the TCGA publication on BLCA (Nature, Volume 507 Number 7492, 315-322, Mar. 20, 2014 [doi:10.1038])

| SampleID     | Histology     | TCGAClass | Two_group | Three_group | Six_group | UNC | MDA     | Lund      | FGFR3m  | FGFR3cna | PIK3CAm | RA5m | chr9pDel | chr9qDel | CKN2Acna | TP53m | MDM2Acna | RB1m | RB1cna | E2F3cna | cor.LUNC.Basal | cor.LUNC.Luminal | cor.MDA.Basal | cor.MDA.Luminal | cor.Lund.M51a | cor.Lund.M51b | cor.Lund.M52a1 | cor.Lund.M52a2 | cor.Lund.M52b1 | cor.Lund.M52b2.1 | cor.Lund.M52b2.2 |        |        |
|--------------|---------------|-----------|-----------|-------------|-----------|-----|---------|-----------|---------|----------|---------|------|----------|----------|----------|-------|----------|------|--------|---------|----------------|------------------|---------------|-----------------|---------------|---------------|----------------|----------------|----------------|------------------|------------------|--------|--------|
| TCGA-DK-A6AV | NA            | NA        | 2         | 2           | 2         | 21  | Luminal | Luminal   | M51b    | 0        | 0       | 0    | 0        | 0        | 0        | 0     | 0        | 0    | 0      | 0       | -0.537         | 0.796            | -0.335        | 0.065           | 0.475         | 0.024         | -0.334         | -0.214         | -0.388         |                  |                  |        |        |
| TCGA-DK-A3WX | Non-papillary | NA        | 3         | 1           | 1         | 11  | Basal   | Basal     | M52b2.2 | 0        | 0       | 0    | 0        | 0        | -1       | 0     | 0        | 0    | 0      | 0       | 0.843          | -0.796           | 0.744         | -0.541          | -0.517        | -0.293        | -0.532         | -0.411         | -0.064         | 0.389            | -0.481           | 0.754  |        |
| TCGA-FD-A33X | Non-papillary | NA        | 2         | 2           | 3         | 31  | Basal   | TP53-like | M52b1   | 0        | 0       | 0    | 0        | 0        | -1       | 0     | 0        | 0    | 0      | 0       | 0.066          | -0.286           | -0.062        | -0.183          | -0.269        | 0.139         | -0.046         | -0.136         | 0.444          | -0.054           | -0.079           |        |        |
| TCGA-DK-A1AC | Non-papillary | NA        | 2         | 2           | 3         | 31  | Luminal | Luminal   | M52b1   | 0        | 0       | 1    | 1        | 0        | 0        | 1     | 0        | 0    | 0      | 2       | -0.075         | 0.296            | -0.136        | -0.067          | 0.119         | -0.292        | 0.421          | -0.192         | -0.214         | -0.342           | -0.039           |        |        |
| TCGA-FD-A43X | NA            | NA        | 1         | 2           | 3         | 31  | Luminal | Luminal   | M51b    | 0        | 0       | 1    | 0        | 0        | 0        | 0     | 0        | 0    | 0      | 0       | -0.62          | 0.757            | -0.183        | 0.157           | 0.286         | 0.221         | 0.16           | -0.051         | -0.264         | -0.424           |                  |        |        |
| TCGA-FD-A58U | NA            | NA        | 1         | 1           | 1         | 11  | Basal   | Basal     | M52b2.2 | 0        | 0       | 0    | 0        | 0        | -1       | 0     | 0        | 0    | 0      | 0       | 0.889          | -0.822           | 0.696         | 0.095           | -0.568        | -0.173        | -0.493         | -0.536         | -0.203         | 0.440            | 0.709            |        |        |
| TCGA-FD-A67G | NA            | NA        | 2         | 2           | 3         | 31  | Luminal | TP53-like | M52b1   | 0        | 0       | 0    | 0        | 0        | 0        | 0     | 1        | 0    | 0      | 1       | 0.096          | 0.231            | -0.174        | 0.454           | 0.019         | -0.073        | -0.018         | -0.021         | 0.134          | 0.293            | -0.227           | -0.206 |        |
| TCGA-BT-A20U | Non-papillary | NA        | 4         | 1           | 1         | 12  | Basal   | Basal     | M52b1   | 0        | 0       | 0    | 0        | 0        | -2       | 1     | 0        | 0    | 0      | 0       | 0.701          | -0.639           | 0.241         | 0.031           | -0.319        | -0.332        | -0.488         | -0.137         | 0.177          | 0.43             | 0.118            | 0.414  |        |
| TCGA-FE-A677 | NA            | NA        | 2         | 2           | 2         | 21  | Luminal | TP53-like | M51b    | 0        | 0       | 0    | 1        | 1        | 0        | -2    | 0        | 0    | 0      | 0       | -0.092         | 0.007            | -0.086        | 0.101           | 0.08          | 0.267         | 0.39           | -0.129         | -0.275         | -0.219           | -0.059           | -0.202 |        |
| TCGA-FE-A47Y | NA            | NA        | 2         | 2           | 2         | 22  | Luminal | Luminal   | M51a.2  | 0        | 0       | 0    | 0        | 0        | 0        | 0     | 0        | 0    | 0      | 0       | -0.631         | 0.562            | -0.48         | 0.15            | 0.206         | 0.758         | 0.681          | -0.147         | -0.589         | -0.395           | 0.202            | -0.578 |        |
| TCGA-FD-A43P | NA            | NA        | 2         | 2           | 3         | 31  | Luminal | Luminal   | M52a2   | 0        | 0       | 0    | 1        | 0        | 0        | 0     | 1        | 0    | 0      | 2       | -0.33          | 0.409            | -0.182        | -0.007          | 0.189         | -0.368        | -0.257         | 0.361          | 0.544          | 0.245            | -0.367           | -0.118 |        |
| TCGA-LT-A526 | NA            | NA        | 2         | 2           | 2         | 21  | Luminal | Luminal   | M52a1   | 0        | 0       | 0    | 0        | 0        | 0        | 0     | 1        | 0    | -2     | 1       | -0.725         | 0.787            | -0.382        | -0.152          | 0.588         | -0.062        | 0.258          | 0.647          | 0.353          | -0.387           | -0.405           | -0.485 |        |
| TCGA-GC-A3Y5 | Non-papillary | NA        | 3         | 1           | 1         | 11  | Basal   | Basal     | M52b2.2 | 0        | 0       | 0    | 0        | 0        | 0        | 0     | 0        | 0    | 1      | -1      | 0.838          | -0.848           | 0.651         | -0.308          | -0.608        | -0.573        | -0.4           | -0.015         | 0.439          | 0.459            | 0.747            | 0.499  |        |
| TCGA-S5-A6DX | NA            | NA        | 2         | 2           | 3         | 31  | Luminal | TP53-like | M52a2   | 0        | 0       | 0    | 0        | 0        | -2       | 0     | 1        | 0    | 0      | 0       | -0.41          | 0.314            | -0.054        | 0.306           | 0.082         | -0.202        | -0.074         | 0.016          | 0.306          | 0.299            | -0.208           | -0.18  |        |
| TCGA-BL-A0C3 | Papillary     | NA        | 1         | 2           | 2         | 21  | Luminal | Luminal   | M52a1   | 0        | 0       | 0    | 0        | 0        | 0        | 0     | 0        | 0    | 0      | 0       | 0.752          | -0.758           | 0.582         | -0.227          | -0.449        | -0.413        | -0.608         | -0.197         | 0.143          | 0.411            | 0.316            | 0.687  |        |
| TCGA-GC-A6I1 | NA            | NA        | 1         | 1           | 1         | 11  | Basal   | Basal     | M52b2.2 | 0        | 0       | 0    | 0        | 0        | 0        | 1     | 0        | 0    | 0      | 0       | 0.841          | -0.854           | 0.727         | -0.212          | -0.515        | -0.247        | -0.56          | -0.455         | -0.069         | 0.448            | -0.449           | 0.73   |        |
| TCGA-CU-A5W6 | NA            | NA        | 2         | 2           | 3         | 31  | Luminal | Luminal   | M51b    | 0        | 1       | 1    | 0        | 0        | -2       | 0     | 0        | 0    | 0      | 0       | -0.713         | 0.644            | -0.146        | -0.033          | 0.39          | 0.034         | 0.261          | 0.176          | 0.072          | -0.251           | 0.019            | -0.49  | -0.444 |
| TCGA-DK-A3WY | Non-papillary | NA        | 4         | 1           | 1         | 12  | Basal   | TP53-like | M52b1   | 0        | 0       | 0    | 0        | 0        | 0        | 0     | 0        | 0    | 0      | 0       | 0.824          | -0.826           | 0.29          | 0.296           | -0.528        | -0.413        | -0.61          | -0.179         | 0.244          | 0.667            | 0.019            | 0.444  |        |
| TCGA-FD-A585 | NA            | NA        | 1         | 1           | 1         | 12  | Basal   | Basal     | M52b1   | 0        | 0       | 0    | 0        | 0        | 0        | 0     | 0        | 0    | 0      | 0       | 0.787          | -0.819           | 0.365         | 0.324           | -0.571        | -0.355        | -0.626         | -0.293         | 0.164          | 0.75             | 0.09             | 0.445  |        |
| TCGA-FD-A382 | Papillary     | NA        | 4         | 1           | 1         | 12  | Basal   | Basal     | M52b2.2 | 0        | 0       | 0    | 0        | 0        | 0        | 0     | 0        | 0    | 0      | 0       | -0.449         | -0.449           | 0.582         | -0.227          | -0.449        | -0.413        | -0.608         | -0.197         | 0.143          | 0.411            | 0.316            | 0.687  |        |
| TCGA-FD-A385 | Non-papillary | NA        | 3         | 1           | 1         | 11  | Basal   | Basal     | M52b2.2 | 0        | 0       | 0    | 0        | 0        | -2       | 0     | 0        | 0    | 0      | 0       | 0.721          | -0.642           | 0.625         | -0.164          | -0.209        | -0.034        | -0.216         | -0.324         | -0.244         | -0.003           | 0.509            | 0.556  |        |
| TCGA-FT-A3EE | Papillary     | NA        | 1         | 1           | 1         | 11  | Basal   | Basal     | M51b    | 0        | 0       | 0    | 1        | 0        | 0        | 0     | 0        | 0    | 1      | 0       | 0.181          | -0.343           | 0.032         | -0.13           | 0.015         | 0.211         | 0.247          | -0.236         | -0.331         | -0.14            | 0.169            | -0.006 |        |
| TCGA-FD-A383 | Papillary     | NA        | 3         | 1           | 1         | 11  | Basal   | Basal     | M52b2.2 | 0        | 0       | 0    | 0        | 0        | 0        | 0     | 0        | 0    | 1      | 0       | 0.918          | -0.837           | 0.76          | 0.046           | -0.569        | -0.376        | -0.662         | -0.417         | 0.022          | 0.555            | 0.433            | 0.788  |        |
| TCGA-FD-A43U | NA            | NA        | 2         | 2           | 3         | 31  | Luminal | TP53-like | M52b1   | 0        | 0       | 0    | 0        | 0        | -1       | 0     | 0        | 0    | 0      | 0       | -0.015         | 0.049            | -0.018        | 0.345           | -0.131        | -0.146        | -0.106         | 0.131          | 0.448          | -0.166           | -0.114           |        |        |
| TCGA-BT-A39T | Papillary     | NA        | 3         | 1           | 1         | 11  | Basal   | Basal     | M52b2.2 | 0        | 0       | 0    | 0        | 0        | 0        | 0     | 0        | 0    | 0      | 0       | 0.501          | -0.501           | 0.683         | -0.083          | -0.138        | -0.375        | -0.306         | 0.012          | 0.461          | 0.391            | 0.112            | 0.391  |        |
| TCGA-FD-A5C1 | NA            | NA        | 1         | 1           | 1         | 11  | Basal   | Basal     | M52b2.2 | 0        | 0       | 0    | 0        | 0        | 0        | 0     | 0        | 0    | 0      | 0       | 0.79           | -0.798           | 0.669         | -0.025          | -0.526        | -0.337        | -0.607         | -0.427         | 0.006          | 0.516            | 0.47             | 0.707  |        |
| TCGA-E7-A4U1 | NA            | NA        | 2         | 2           | 2         | 21  | Luminal | Luminal   | M52a1   | 0        | 0       | 0    | 0        | 0        | 0        | 0     | 0        | -2   | 1      | 0       | -0.698         | 0.762            | -0.383        | -0.117          | 0.425         | 0.08          | 0.257          | 0.45           | 0.191          | -0.31            | -0.354           | -0.448 |        |
| TCGA-GV-A40E | Non-papillary | NA        | 3         | 1           | 1         | 11  | Basal   | Basal     | M52b2.2 | 0        | 0       | 0    | 0        | 0        | 0        | 0     | 0        | 0    | 2      | 0       | 0.731          | -0.708           | 0.571         | -0.226          | -0.38         | -0.356        | -0.459         | -0.208         | 0.098          | 0.221            | 0.313            | 0.667  | 0.504  |
| TCGA-GD-A76B | NA            | NA        | 2         | 2           | 2         | 21  | Luminal | Luminal   | M52a1   | 0        | 0       | 1    | 0        | 0        | -1       | 0     | 0        | 0    | 0      | 0       | -0.74          | 0.83             | -0.387        | 0.154           | 0.034         | 0.174         | 0.344          | 0.237          | -0.044         | -0.406           | -0.504           | -0.504 |        |
| TCGA-BT-A30T | Non-papillary | NA        | 2         | 2           | 3         | 31  | Basal   | TP53-like | M52b2.1 | 1        | 1       | 0    | 0        | 1        | 0        | 0     | 0        | 0    | 0      | 0       | 0.054          | 0.046            | 0.063         | 0.083           | 0.114         | 0.138         | 0.113          | -0.306         | 0.073          | 0.243            | -0.07            | 0.243  |        |
| TCGA-LU-V780 | NA            | NA        | 2         | 2           | 2         | 21  | Luminal | Luminal   | M51b    | 0        | 0       | 0    | 0        | 0        | 0        | 1     | 0        | 0    | 0      | 0       | -0.764         | 0.84             | -0.513        | 0.11            | 0.554         | 0.218         | 0.561          | 0.284          | 0.01           | -0.341           | -0.403           | -0.653 |        |
| TCGA-BT-A05T | Non-papillary | NA        | 3         | 2           | 3         | 32  | Basal   | Basal     | M52b2.2 | 1        | 0       | 0    | 0        | 0        | -2       | 0     | 2        | 0    | 1      | 0       | 0.653          | -0.638           | 0.348         | 0.016           | -0.303        | -0.227        | -0.388         | -0.129         | 0.061          | 0.241            | 0.22             | 0.441  |        |
| TCGA-H4-A2HQ | Non-papillary | NA        | 1         | 2           | 2         | 22  | Luminal | Luminal   | M51b    | 0        | 0       | 0    | 0        | 0        | -2       | 0     | 0        | 0    | 0      | 0       | -0.203         | 0.316            | -0.162        | 0.289           | 0.016         | 0.328         | 0.016          | -0.268         | -0.462         | 0.116            | -0.25            | 0.125  |        |
| TCGA-KQ-A14N | NA            | NA        | 2         | 2           | 2         | 21  | Luminal | Luminal   | M51b    | 0        | 0       | 0    | 0        | 0        | 0        | 0     | 0        | 0    | 0      | 1       | -0.459         | 0.591            | -0.392        | 0.083           | 0.378         | 0.204         | 0.466          | 0.297          | -0.011         | -0.372           | -0.341           | -0.504 |        |
| TCGA-BT-A07X | Non-papillary | NA        | 3         | 1           | 1         | 11  | Basal   | Basal     | M52b2.1 | 0        | 0       | 0    | 0        | 0        | -2       | 0     | 0        | 0    | 0      | 0       | 0.713          | 0.53             | -0.217        | -0.042          | -0.287        | -0.292        | -0.456         | -0.263         | 0.148          | 0.627            | 0.578            | 0.578  |        |
| TCGA-CU-A0YD | Non-papillary | NA        | 2         | 2           | 3         | 31  | Luminal | TP53-like | M51a    | 0        | 0       | 0    | 0        | 0        | 0        | 0     | 0        | 0    | 0      | 0       | -0.449         | 0.275            | -0.182        | 0.397           | 0.086         | 0.222         | -0.333         | 0.084          | -0.291         | 0.054            | -0.291           | 0.054  |        |
| TCGA-FD-A67C | NA            | NA        | 2         | 2           | 3         | 31  | Basal   | TP53-like | M52a2   | 0        | 0       | 0    | 0        | 0        | 0        | 1     | 0        | 1    | 0      | 0       | 0.426          | -0.343           | -0.07         | 0.189           | -0.076        | -0.206        | -0.074         | 0.06           | 0.169          | 0.135            | -0.112           | 0.029  |        |
| TCGA-BT-A2LA | NA            | NA        | 2         | 2           | 3         | 32  | Basal   | TP53-like | M52a2   | 0        | 0       | 0    | 0        | 0        | 0        | 1     | 0        | 1    | 0      | 2       | 0.556          | -0.384           | 0.095         | 0.111           | -0.203        | -0.268        | -0.24          | 0.268          | 0.292          | 0.081            | -0.258           | 0.112  |        |
| TCGA-PQ-A6FN | NA            | NA        | 1         | 1           | 1         | 11  | Basal   | Basal     | M52b2.2 | 0        | 0       | 0    | 0        | 0        | 0        | 0     | 0        | 1    | 0      | 0       | 0.682          | -0.694           | 0.631         | -0.025          | -0.329        | -0.222        | -0.372         | -0.313         | 0.062          | 0.236            | 0.411            | 0.586  |        |
| TCGA-GC-A3RC | Non-papillary | NA        | 3         | 1           | 1         | 11  | Basal   | Basal     | M52b2.2 | 0        | 0       | 0    | 0        | 0        | 0        | 0     | 0        | 0    | 0      | 0       | 0.831          | -0.801           | 0.717         | -0.261          | -0.426        | -0.239        | -0.456         | -0.356         | -0.078         | 0.257            | 0.426            | 0.576  |        |
| TCGA-DK-A1Z1 | Non-papillary | NA        | 3         | 1           | 1         | 11  | Basal   | Basal     | M52b2.2 | 0        | 0       | 0    | 0        | 0        | 0        | 0     | 0        | 0    | 0      | 0       | 0.515          | -0.515           | 0.85          | -0.083          | 0.571         | 0.908         | -0.422         | -0.851         | 0.478          | 0.48             | 0.747            |        |        |
| TCGA-FD-A3B7 | Non-papillary | NA        | 4         | 1           | 1         | 12  | Basal   | Basal     | M52b2.2 | 0        | 0       | 0    | 0        | 0        | 0        | 0     | 1        | 0    | 0      | 0       | 0.882          | -0.861           | 0.67          | 0.068           | -0.636        | -0.321        | -0.618         | -0.456         | -0.045         | 0.591            | 0.423            | 0.728  |        |
| TCGA-FD-A625 | NA            | NA        | 1         | 1           | 1         | 12  | Basal   | Basal     | M52b2.2 | 0        | 0       | 0    | 0        | 0        | -1       | 1     | 0        | 0    | 0      | 0       | 0.912          | -0.879           | 0.673         | 0.189           | -0.627        | -0.462        | -0.048         | 0.618          | 0.373          | 0.723            | 0.723            |        |        |
| TCGA-G2-A2EL | NA            | NA        | 2         | 2           | 3         | 32  | Basal   | Basal     | M52a1   | 0        | 0       | 0    | 0        | 0        | 0        | 1     | 0        | 1    | 0      | 0       | 0.49           | -0.291           | 0.166         | -0.088          | -0.056        | -0.197        | -0.16          | 0.262          | -0.107         | -0.126           | 0.102            | 0.192  |        |
| TCGA-BT-A20U | Non-papillary | NA        | 3         | 1           | 1         | 11  | Basal   | Basal     | M52b2.1 | 0        | 0       | 0    | 0        | 0        | -2       | 1     | 0        | 0    | 0      | 0       | 0.             |                  |               |                 |               |               |                |                |                |                  |                  |        |        |





|              |               |   |   |   |    |         |           |         |   |    |   |   |   |   |        |      |        |        |       |       |        |        |        |        |        |        |        |        |        |        |        |        |
|--------------|---------------|---|---|---|----|---------|-----------|---------|---|----|---|---|---|---|--------|------|--------|--------|-------|-------|--------|--------|--------|--------|--------|--------|--------|--------|--------|--------|--------|--------|
| TCGA-BT-A20R | Non-papillary | 2 | 2 | 3 | 31 | Basal   | TP53-like | MS2b1   | 0 | 0  | 1 | 0 | 0 | 0 | 0      | 1    | 0      | 1      | 0     | 2     | 0.257  | -0.209 | -0.049 | 0.333  | -0.16  | -0.318 | -0.351 | 0.165  | 0.351  | 0.419  | -0.286 | 0.045  |
| TCGA-GV-A30G | Papillary     | 4 | 1 | 1 | 12 | Basal   | TP53-like | MS2b1   | 0 | 0  | 0 | 0 | 0 | 0 | 0      | 0    | 0      | 0      | 0     | 0     | 0.344  | -0.437 | -0.112 | 0.289  | -0.309 | -0.451 | -0.484 | 0.02   | 0.421  | 0.6    | -0.213 | 0.189  |
| TCGA-FD-A35R | Non-papillary | 2 | 2 | 3 | 31 | Basal   | TP53-like | MS2a2   | 0 | 0  | 0 | 0 | 0 | 0 | 0      | -1   | 1      | 0      | 0     | 1     | 0.106  | 0.001  | -0.169 | 0.296  | -0.023 | -0.314 | -0.353 | 0.264  | 0.429  | 0.375  | -0.203 | -0.033 |
| TCGA-E7-A54I | NA            | 2 | 2 | 2 | 21 | Luminal | Luminal   | MS2a2   | 0 | 0  | 0 | 0 | 0 | 0 | 0      | 0    | 1      | 0      | -2    | 0     | -0.452 | 0.522  | -0.18  | -0.157 | 0.178  | -0.11  | -0.052 | 0.176  | 0.204  | 0.007  | -0.089 | -0.09  |
| TCGA-GV-A30H | Non-papillary | 1 | 2 | 2 | 21 | Luminal | Luminal   | MS2a1   | 0 | 0  | 0 | 0 | 0 | 0 | 0      | -2   | 1      | 0      | 0     | 2     | -0.831 | 0.9    | -0.409 | -0.204 | 0.553  | 0.017  | 0.358  | 0.658  | 0.315  | -0.523 | -0.445 | -0.517 |
| TCGA-G2-A31B | Non-papillary | 3 | 1 | 1 | 11 | Basal   | Basal     | MS2b2.2 | 0 | -1 | 0 | 0 | 0 | 1 | 0      | -1   | 1      | 0      | 0     | 0     | 0.697  | -0.638 | 0.589  | -0.319 | -0.209 | -0.001 | -0.114 | -0.257 | -0.241 | -0.159 | 0.487  | 0.509  |
| TCGA-BT-A20N | Non-papillary | 1 | 2 | 3 | 32 | Basal   | Luminal   | MS1b    | 0 | 0  | 0 | 0 | 0 | 0 | -1     | 1    | 0      | 0      | -1    | 0     | 0.108  | 0.082  | 0.057  | -0.31  | 0.19   | 0.08   | 0.176  | 0.129  | -0.093 | -0.374 | 0.056  | 0.031  |
| TCGA-E7-A6ME | NA            | 2 | 3 | 3 | 32 | Luminal | Luminal   | MS2a1   | 0 | 0  | 0 | 0 | 0 | 0 | 0      | 1    | 0      | 1      | -1    | 0     | -0.606 | 0.758  | -0.291 | 0.077  | 0.369  | -0.088 | 0.109  | 0.55   | 0.342  | -0.171 | -0.406 | -0.408 |
| TCGA-DK-A31T | Non-papillary | 2 | 2 | 3 | 31 | Luminal | TP53-like | MS2a2   | 0 | -1 | 0 | 0 | 0 | 0 | 0      | 0    | 0      | 0      | 0     | 0     | -0.322 | 0.227  | -0.141 | 0.256  | 0.116  | -0.289 | -0.034 | 0.215  | 0.122  | 0.122  | -0.246 | -0.131 |
| TCGA-UY-A78L | NA            | 1 | 1 | 1 | 11 | Basal   | Basal     | MS2b2.2 | 0 | 0  | 0 | 0 | 0 | 0 | 0      | 1    | 0      | 1      | 0     | 0     | 0.699  | -0.697 | 0.485  | -0.081 | -0.294 | -0.368 | -0.433 | -0.055 | 0.167  | 0.191  | 0.268  | 0.535  |
| TCGA-UY-A47V | NA            | 2 | 2 | 2 | 22 | Luminal | Luminal   | MS1b    | 1 | 2  | 0 | 0 | 0 | 1 | 0      | 0    | 0      | 0      | 0     | 0     | -0.727 | -0.057 | -0.391 | -0.154 | 0.232  | 0.534  | 0.598  | -0.133 | -0.388 | -0.251 | -0.219 | -0.553 |
| TCGA-FJ-A3ZF | Papillary     | 1 | 2 | 2 | 21 | Luminal | Luminal   | MS2a1   | 1 | 0  | 0 | 0 | 0 | 0 | 0      | 1    | 0      | 0      | 0     | 2     | -0.821 | 0.917  | -0.518 | -0.094 | 0.599  | -0.037 | 0.343  | 0.703  | 0.378  | -0.42  | -0.651 | -0.555 |
| TCGA-FD-A6TH | NA            | 1 | 3 | 3 | 31 | Basal   | Basal     | MS2a2   | 0 | 0  | 0 | 0 | 0 | 0 | 0      | 0    | 1      | 0      | 0     | 0     | 0.577  | -0.541 | 0.202  | 0.08   | -0.238 | -0.385 | -0.401 | 0.118  | 0.337  | 0.248  | -0.126 | 0.335  |
| TCGA-FD-A3N5 | Non-papillary | 3 | 1 | 1 | 11 | Basal   | Basal     | MS2b2.2 | 0 | 0  | 0 | 0 | 0 | 0 | 1      | 1    | 0      | 1      | -2    | 2     | 0.699  | -0.663 | 0.669  | -0.169 | -0.333 | -0.26  | -0.374 | -0.195 | -0.032 | 0.074  | 0.422  | 0.676  |
| TCGA-K4-A54R | NA            | 2 | 3 | 3 | 31 | Basal   | Basal     | MS2b1   | 0 | -1 | 1 | 0 | 0 | 0 | 0      | 1    | 0      | 1      | -1    | 1     | 0.34   | -0.478 | 0.103  | 0.068  | -0.119 | -0.29  | -0.262 | -0.064 | 0.209  | 0.311  | -0.004 | 0.194  |
| TCGA-GV-A30J | Papillary     | 1 | 2 | 3 | 32 | Luminal | Luminal   | MS2a1   | 0 | 0  | 0 | 0 | 0 | 0 | 0      | 0    | 0      | -2     | 0     | 0     | -0.137 | 0.176  | -0.201 | -0.066 | 0.181  | 0.061  | 0.216  | 0.438  | 0.087  | -0.381 | -0.292 | -0.238 |
| TCGA-HQ-A20E | Papillary     | 1 | 2 | 2 | 21 | Luminal | Luminal   | MS1b    | 0 | 0  | 0 | 0 | 1 | 1 | -1     | 0    | 1      | 0      | -1    | 1     | -0.623 | 0.464  | -0.31  | -0.178 | 0.403  | 0.02   | 0.345  | 0.321  | 0.154  | -0.384 | -0.263 | -0.33  |
| TCGA-G2-A31E | Non-papillary | 1 | 2 | 2 | 21 | Luminal | Luminal   | MS1b    | 0 | 0  | 0 | 0 | 0 | 0 | -1     | 1    | 0      | 0      | 0     | 0     | -0.816 | 0.863  | -0.563 | -0.038 | 0.602  | 0.368  | 0.626  | 0.273  | -0.085 | -0.448 | -0.432 | -0.685 |
| TCGA-H4-A2HD | Papillary     | 1 | 2 | 2 | 21 | Luminal | Luminal   | MS2a1   | 0 | 0  | 1 | 0 | 0 | 0 | 0      | 0    | 1      | 0      | 0     | 0     | -0.836 | 0.839  | -0.553 | 0.226  | 0.426  | 0.069  | 0.251  | 0.37   | 0.199  | -0.028 | -0.552 | -0.588 |
| TCGA-HQ-A415 | NA            | 2 | 3 | 3 | 31 | Luminal | TP53-like | MS2b1   | 0 | 0  | 0 | 0 | 0 | 0 | 0      | 1    | 0      | -1     | 0     | 0     | -0.166 | 0.234  | -0.208 | 0.35   | -0.043 | -0.155 | -0.097 | 0.21   | 0.21   | 0.233  | 0.266  | -0.186 |
| TCGA-DK-A3WW | Papillary     | 3 | 1 | 1 | 11 | Basal   | Basal     | MS2b2.2 | 0 | 0  | 1 | 0 | 0 | 0 | 0      | -2   | 0      | 0      | 0     | 0     | 0.767  | -0.782 | 0.691  | -0.309 | -0.457 | -0.205 | -0.484 | -0.427 | -0.127 | 0.324  | 0.521  | 0.718  |
| TCGA-FD-A58Z | NA            | 2 | 3 | 3 | 31 | Luminal | TP53-like | MS2b1   | 0 | 0  | 0 | 1 | 1 | 1 | -2     | 0    | 2      | 0      | 0     | 0     | -0.142 | 0.225  | -0.023 | 0.521  | -0.087 | -0.08  | 0.079  | -0.02  | 0.05   | 0.252  | -0.263 | -0.2   |
| TCGA-DK-A31L | Non-papillary | 2 | 2 | 3 | 31 | Luminal | TP53-like | MS2a1   | 0 | 0  | 0 | 0 | 0 | 0 | 0      | 1    | 0      | 1      | 0     | 0     | -0.363 | 0.654  | -0.392 | 0.299  | 0.274  | -0.026 | 0.231  | 0.404  | 0.253  | -0.172 | -0.455 | -0.425 |
| TCGA-DK-A68Z | NA            | 2 | 3 | 3 | 31 | Luminal | TP53-like | MS2a2   | 0 | 0  | 1 | 0 | 0 | 0 | 0      | 1    | 0      | 0      | 0     | 0     | -0.191 | 0.513  | -0.301 | 0.288  | 0.18   | -0.152 | 0.001  | 0.194  | 0.321  | 0.258  | -0.503 | -0.323 |
| TCGA-GV-A31Z | Non-papillary | 2 | 2 | 3 | 31 | Luminal | Luminal   | MS2a2   | 0 | 0  | 0 | 0 | 0 | 0 | 1      | 1    | -1     | 0      | 0     | 2     | -0.13  | 0.283  | -0.217 | 0.038  | 0.133  | -0.348 | -0.136 | 0.461  | 0.078  | 0.078  | -0.421 | -0.136 |
| TCGA-FD-A6TD | NA            | 1 | 1 | 1 | 11 | Basal   | Basal     | MS2b2.2 | 0 | 0  | 1 | 0 | 0 | 0 | 0      | 1    | 0      | 1      | 0     | 0     | 0.744  | -0.774 | 0.632  | -0.058 | -0.516 | -0.299 | -0.564 | -0.411 | -0.037 | 0.47   | 0.493  | 0.693  |
| TCGA-FD-A43X | NA            | 2 | 2 | 2 | 22 | Luminal | Luminal   | MS1b    | 1 | 0  | 0 | 0 | 1 | 1 | -2     | 0    | 0      | 0      | 0     | 0     | -0.798 | 0.685  | -0.463 | -0.071 | 0.459  | 0.659  | 0.754  | 0.006  | -0.474 | -0.575 | -0.16  | -0.606 |
| TCGA-BT-A42C | Papillary     | 1 | 2 | 2 | 21 | Luminal | Luminal   | MS1b    | 1 | 0  | 0 | 0 | 1 | 1 | -0.749 | 0.72 | -0.249 | -0.165 | 0.745 | 0.241 | -0.537 | -0.498 | 0.241  | 0.537  | 0.241  | 0.537  | 0.241  | 0.537  | -0.122 | -0.553 | -0.039 | -0.397 |
| TCGA-GV-A32F | Papillary     | 1 | 2 | 2 | 21 | Luminal | Luminal   | MS2a1   | 0 | 0  | 0 | 0 | 0 | 0 | -2     | 0    | 0      | 0      | 0     | 0     | -0.826 | 0.866  | -0.468 | -0.144 | 0.561  | 0.108  | 0.457  | 0.46   | 0.178  | -0.502 | -0.289 | -0.526 |
| TCGA-FJ-A3ZE | Non-papillary | 1 | 2 | 2 | 22 | Luminal | Luminal   | MS1b    | 1 | 0  | 0 | 0 | 0 | 0 | -2     | 1    | 0      | 0      | 0     | 0     | -0.313 | 0.389  | -0.236 | -0.211 | 0.401  | 0.288  | 0.417  | 0.252  | -0.138 | -0.574 | -0.073 | -0.298 |
| TCGA-K4-A6FZ | NA            | 1 | 1 | 1 | 11 | Basal   | Basal     | MS2b2.2 | 0 | 0  | 0 | 0 | 0 | 0 | 0      | 1    | 0      | 1      | 0     | 2     | 0.22   | -0.38  | 0.431  | -0.191 | -0.029 | 0.246  | 0.107  | -0.364 | -0.43  | -0.121 | 0.502  | 0.168  |
| TCGA-BT-A42E | NA            | 1 | 1 | 1 | 11 | Basal   | Basal     | MS2b2.2 | 0 | 0  | 0 | 0 | 0 | 0 | -2     | 0    | 0      | 0      | 0     | 0     | 0.854  | -0.832 | 0.701  | -0.248 | -0.433 | -0.289 | -0.504 | -0.41  | -0.044 | 0.334  | 0.474  | 0.757  |
| TCGA-DK-A686 | NA            | 2 | 2 | 2 | 21 | Luminal | Luminal   | MS1b    | 0 | 0  | 0 | 0 | 0 | 0 | 0      | 1    | 0      | 0      | 0     | 0     | -0.809 | 0.852  | -0.504 | -0.179 | 0.582  | 0.277  | 0.434  | 0.349  | 0.035  | -0.325 | -0.396 | -0.643 |
| TCGA-GU-A76Z | NA            | 1 | 1 | 1 | 12 | Basal   | Basal     | MS2b2.2 | 0 | 0  | 0 | 0 | 0 | 0 | 0      | 1    | 0      | 0      | 0     | 0     | 0.807  | -0.809 | 0.617  | -0.057 | -0.617 | -0.328 | -0.61  | -0.351 | 0.037  | 0.526  | 0.289  | 0.695  |
| TCGA-G2-A2E5 | Non-papillary | 3 | 1 | 1 | 11 | Basal   | Basal     | MS2b2.2 | 0 | 0  | 0 | 0 | 0 | 0 | 0      | 1    | 0      | 0      | -1    | 0     | 0.796  | -0.718 | 0.668  | -0.23  | -0.396 | -0.153 | -0.388 | -0.461 | -0.203 | 0.238  | 0.624  | 0.679  |
| TCGA-CF-A47T | NA            | 2 | 2 | 2 | 22 | Luminal | Luminal   | MS1b    | 0 | 0  | 1 | 0 | 0 | 0 | -2     | 0    | 0      | 0      | 0     | 0     | -0.748 | 0.876  | -0.38  | -0.047 | 0.477  | 0.47   | 0.696  | 0.065  | -0.338 | -0.564 | -0.169 | -0.502 |
| TCGA-DK-A1A8 | Non-papillary | 3 | 1 | 1 | 11 | Basal   | Basal     | MS2b2.2 | 0 | 0  | 1 | 0 | 0 | 0 | 0      | 1    | 0      | 0      | 0     | 0     | 0.859  | -0.756 | 0.527  | 0.213  | -0.513 | -0.033 | -0.415 | -0.547 | -0.306 | 0.437  | 0.491  | 0.584  |
| TCGA-UY-A78N | NA            | 2 | 3 | 3 | 32 | Luminal | Luminal   | MS2a1   | 1 | 0  | 0 | 0 | 0 | 0 | 0      | 1    | 0      | -2     | 1     | 0     | -0.515 | 0.711  | -0.328 | 0.141  | 0.256  | 0.031  | 0.273  | 0.41   | 0.144  | -0.313 | -0.381 | -0.34  |
| TCGA-DK-A3H5 | Papillary     | 1 | 2 | 2 | 22 | Luminal | Luminal   | MS1b    | 1 | 2  | 0 | 0 | 1 | 1 | -1     | 1    | 0      | 0      | 0     | 0     | -0.658 | 0.693  | -0.305 | -0.281 | 0.46   | 0.321  | 0.491  | 0.103  | -0.236 | -0.581 | 0.167  | -0.306 |
| TCGA-FD-A6TF | NA            | 2 | 3 | 3 | 31 | Basal   | TP53-like | MS2b1   | 0 | 0  | 0 | 0 | 0 | 0 | 0      | 1    | 0      | 1      | 0     | 0     | 0.685  | -0.677 | 0.272  | 0.354  | -0.393 | -0.4   | -0.55  | 0.013  | 0.296  | 0.508  | -0.061 | 0.363  |
| TCGA-BT-A20P | Non-papillary | 1 | 2 | 2 | 22 | Luminal | Luminal   | MS1b    | 0 | 2  | 0 | 0 | 0 | 1 | -2     | 0    | 1      | 0      | 0     | 0     | -0.484 | 0.45   | -0.287 | -0.073 | 0.194  | 0.401  | 0.452  | 0.009  | -0.294 | -0.431 | 0.066  | -0.337 |
| TCGA-E5-A4U1 | NA            | 2 | 2 | 2 | 21 | Luminal | Luminal   | MS1b    | 0 | 1  | 0 | 0 | 1 | 1 | -1     | 1    | 0      | 0      | 0     | 0     | -0.735 | 0.789  | -0.441 | -0.016 | 0.467  | 0.276  | 0.57   | 0.353  | -0.016 | -0.551 | -0.337 | -0.567 |

**Supplementary table 7**

Gene signatures used in Figures 1-2, Gene IDs are according to TCGA nomenclature

>Blaveri\_SCCdown

CLDN4|1364  
EPCAM|4072  
ERBB2|2064  
GATA3|2625  
GPD1L|23171  
S100P|6286  
SLC9A1|6548

>Blaveri\_SCCup

APBA1|320  
CA2|760  
CAD|790  
COL17A1|1308  
DSC2|1824  
ELL2|22936  
HBEGF|1839  
IL13RA2|3598  
KRT14|3861  
KRT16|3868  
KRT5|3852  
LGALS7|3963  
LOC100133331|100133331  
MAF|4094  
MMP3|4314  
MXD1|4084  
PI3|5266  
PTHLH|5744  
PURA|5813  
S100A7|6278  
S100A8|6279  
SFN|2810

>Lund\_QTC1\_TCell

ABI3|51225  
ACAP1|9744  
ADAMDEC1|27299  
ADAP2|55803  
AIF1|199  
ALOX5AP|241  
AMICA1|120425  
ANXA6|309  
AOAH|313  
AP1S2|8905  
APOE|348  
ARHGAP15|55843  
ARHGAP25|9938  
ARHGAP9|64333  
ATP8B4|79895  
BATF3|55509  
BIN1|274  
BTK|695  
C1orf162|128346  
C1orf54|79630  
C1QA|712  
C1QB|713  
C1QC|714  
C1S|716  
C3AR1|719  
CCL2|6347  
CCL5|6352  
CD14|929  
CD163|9332  
CD2|914  
CD209|30835  
CD247|919  
CD300LF|146722  
CD37|951  
CD38|952  
CD3D|915  
CD48|962  
CD52|1043  
CD53|963  
CD6|923  
CD7|924  
CD74|972  
CD86|942  
CLEC4A|50856

CORO1A|11151  
CPVL|54504  
CSF1R|1436  
CST7|8530  
CTLA4|1493  
CTSK|1513  
CYBB|1536  
CYTH4|27128  
CYTIP|9595  
DOCK10|55619  
DOCK11|139818  
DOCK2|1794  
EMP3|2014  
ENTPD1|953  
EVI2A|2123  
EVI2B|2124  
FAM65B|9750  
FCER1G|2207  
FCN1|2219  
FERMT3|83706  
FGL2|10875  
FPR3|2359  
FYB|2533  
FYN|2534  
GIMAP1|170575  
GIMAP4|55303  
GIMAP5|55340  
GIMAP7|168537  
GLIPR2|152007  
GPR183|1880  
GPR65|8477  
GYPC|2995  
GZMA|3001  
GZMB|3002  
GZMH|2999  
GZMK|3003  
HAVCR2|84868  
HCST|10870  
HLA-DMB|3109  
HLA-DPA1|3113  
HLA-DPB1|3115  
HLA-DQA1|3117  
HLA-DRA|3122  
ICOS|29851  
IFFO1|25900  
IFI30|10437  
IFITM1|8519  
IGSF6|10261  
IKZF1|10320  
IL10RA|3587  
IL18BP|10068  
IL18RAP|8807  
IL2RA|3559  
IL2RB|3560  
IL7R|3575  
IQGAP2|10788  
IRF8|3394  
ISG20|3669  
ITGAL|3683  
ITGAM|3684  
ITGB2|3689  
ITK|3702  
KIAA1949|170954  
LAPTM5|7805  
LAT2|7462  
LILRB2|10288  
LILRB4|11006  
LILRB5|10990  
LOC100133331|100133331  
LST1|7940  
LTA|4049  
LTB|4050  
LY86|9450  
LY96|23643  
LYL1|4066  
MAP4K1|11184  
MATK|4145  
MFNG|4242  
MMP9|4318  
MS4A4A|51338  
MS4A6A|64231  
MSN|4478

MYO1G|64005  
NCF1|653361  
NCF1C|654817  
NCKAP1L|3071  
NKG7|4818  
P2RY13|53829  
PARVG|64098  
PDE4B|5142  
PECAM1|5175  
PIK3AP1|118788  
PIM2|11040  
PLA2G4C|8605  
PLEK|5341  
PLEKHO1|51177  
PLEKHO2|80301  
PPP1R16B|26051  
PRF1|5551  
PTPN22|26191  
PTPN7|5778  
PTPRCAP|5790  
PVRIG|79037  
PYHIN1|149628  
RASAL3|64926  
RASSF4|83937  
RGS1|5996  
RGS18|64407  
RGS2|5997  
RNASE6|6039  
RUNX3|864  
SAMS1|64092  
SASH3|54440  
SH2B3|10019  
SIGLEC10|89790  
SLA|6503  
SLAMF1|6504  
SLAMF6|114836  
SLAMF8|56833  
SLC7A7|9056  
SLCO2B1|11309  
SPI1|6688  
SRGN|5552  
ST6GAL1|6480  
STAT4|6775  
SUSD3|203328  
TBC1D10C|374403  
TBXAS1|6916  
TLR8|51311  
TMEM176A|55365  
TNFRSF1B|7133  
TNFRSF4|7293  
TNFSF13B|10673  
TOX2|84969  
TRAF3IP3|80342  
TRPV2|51393  
TSPAN4|7106  
TYROBP|7305  
WAS|7454  
WIPF1|7456

>Lund\_QTC14\_UrothelialDifferentiation

ACER2|340485  
BCAS1|8537  
C10orf116|10974  
CAPN5|726  
CYB5A|1528  
CYP4B1|1580  
CYP4F12|66002  
CYP4F22|126410  
DHRS2|10202  
FAM174B|400451  
FAM3B|54097  
GGT6|124975  
HMGCS2|3158  
HPGD|3248  
PKHD1|5314  
PPARG|5468  
PPFIBP2|8495  
PSCA|8000  
SNCG|6623  
TBX3|6926  
TRAK1|22906

UPK1A|11045  
VSIG2|23584

>Lund\_QTC16\_FGFR3signature

C16orf74|404550  
C3orf54|389119  
CAPNS2|84290  
CLCA4|22802  
DUOX1|53905  
DUOXA1|90527  
FGFR3|2261  
IRS1|3667  
LOC100133331|100133331  
PLCH2|9651  
PTPN13|5783  
SEMA4B|10509  
SLC2A9|56606  
SMAD3|4088  
SSH3|54961  
SYTL1|84958  
TMPRSS4|56649  
TP63|8626  
WNT7B|7477  
ZNF385A|25946

>Lund\_QTC17\_MyeloidCell

AQP9|366  
BCL2A1|597  
C19orf59|199675  
CCL3|6348  
CCR1|1230  
CSF3R|1441  
CXCL2|2920  
FCGR3B|2215  
ITGAX|3687  
MMP25|64386  
MNDA|4332  
OSM|5008  
PHACTR1|221692  
PROK2|60675  
SOD2|6648  
TAGAP|117289  
VNN2|8875

>Lund\_QTC3\_Proliferation

ANLN|54443  
ASF1B|55723  
ASPM|259266  
ATAD2|29028  
AURKA|6790  
AURKB|9212  
BIRC5|332  
BUB1|699  
BUB1B|701  
C12orf48|55010  
C15orf23|90417  
C16orf59|80178  
C17orf53|78995  
C1orf112|55732  
C1orf135|79000  
CCNA2|890  
CCNB1|891  
CCNB2|9133  
CCNE2|9134  
CDC20|991  
CDC25A|993  
CDC25C|995  
CDC45|8318  
CDCA2|157313  
CDCA3|83461  
CDCA5|113130  
CDCA8|55143  
CDK1|983  
CDKN3|1033  
CDT1|81620  
CENPA|1058  
CENPE|1062  
CENPF|1063  
CENPL|91687

CENPM|79019  
CENPN|55839  
CENPW|387103  
CEP55|55165  
CHAF1B|8208  
CHEK1|1111  
CKAP2L|150468  
CKS1B|1163  
DEPDC1|55635  
DEPDC1B|55789  
DLGAP5|9787  
DONSON|29980  
DTL|51514  
E2F2|1870  
ECT2|1894  
EXO1|9156  
FAM64A|54478  
FAM83D|81610  
FANCI|55215  
FEN1|2237  
FOXM1|2305  
GINS2|51659  
H2AFZ|3015  
HJURP|55355  
HMGB2|3148  
HMMR|3161  
KIAA1524|57650  
KIF11|3832  
KIF14|9928  
KIF15|56992  
KIF18A|81930  
KIF20A|10112  
KIF20B|9585  
KIF23|9493  
KIF2C|11004  
KIF4A|24137  
KIFC1|3833  
KPNA2|3838  
LMNB1|4001  
LOC100133331|100133331  
MCM10|55388  
MCM2|4171  
MCM6|4175  
MCM7|4176  
MELK|9833  
MND1|84057  
NCAPG|64151  
NCAPG2|54892  
NDC80|10403  
NEK2|4751  
NUF2|83540  
NUSAP1|51203  
OIP5|11339  
PKMYT1|9088  
PLK4|10733  
POC1A|25886  
POLA2|23649  
POLE2|5427  
POLQ|10721  
PRC1|9055  
PRR11|55771  
PTTG1|9232  
PTTG3P|26255  
RACGAP1|29127  
RAD51AP1|10635  
RFC3|5983  
RFC4|5984  
RNASEH2A|10535  
RRM2|6241  
SGOL1|151648  
SGOL2|151246  
SKA1|220134  
SKA3|221150  
SPC25|57405  
STIL|6491  
TK1|7083  
TOP2A|7153  
TPX2|22974  
TRIP13|9319  
TTK|7272  
TYMS|7298  
UBE2C|11065

UBE2T|29089  
UHRF1|29128  
ZWINT|11130

>Lund\_QTC4\_ECM

ACTA2|59  
ACTG2|72  
AEBP1|165  
ANGPTL2|23452  
ARHGAP24|83478  
BNC2|54796  
C1QTNF1|114897  
C1R|715  
CALD1|800  
CD248|57124  
CD93|22918  
CDH11|1009  
CHN1|1123  
CLIP3|25999  
COL15A1|1306  
COL1A1|1277  
COL1A2|1278  
COL3A1|1281  
COL5A1|1289  
COL5A2|1290  
COL6A1|1291  
COL6A2|1292  
COL6A3|1293  
COL8A1|1295  
COLEC12|81035  
COX7A1|1346  
CPXM1|56265  
CRISPLD2|83716  
CTHRC1|115908  
DACT3|147906  
DCN|1634  
DDR2|4921  
DPYSL2|1808  
ECM2|1842  
EDNRA|1909  
EMILIN1|11117  
FAM20C|56975  
FERMT2|10979  
FILIP1L|11259  
FSTL1|11167  
GEM|2669  
GLT8D2|83468  
GPR124|25960  
GUCY1A3|2982  
HEPH|9843  
IGDCC4|57722  
ISLR|3671  
JAM3|83700  
KCNMB1|3779  
LAMA4|3910  
LGALS1|3956  
LHFP|10186  
LMCD1|29995  
LOC100133331|100133331  
LRR32|2615  
LRR33|375387  
LUM|4060  
MFG8|4240  
MSC|9242  
MSRB3|253827  
MYADM|91663  
MYL9|10398  
MYLK|4638  
OLFML1|283298  
OLFML2B|25903  
PAPSS2|9060  
PCOLCE|5118  
PCSK5|5125  
PDGFRB|5159  
PDLIM3|27295  
PDPN|10630  
POSTN|10631  
PRKCDBP|112464  
PRRX1|5396  
PTRF|284119  
PXDN|7837

RAB3IL1|5866  
RARRES2|5919  
RCN3|57333  
SCARF2|91179  
SERPINF1|5176  
SGIP1|84251  
SPARC|6678  
SPON2|10417  
SSC5D|284297  
STX2|2054  
SULF1|23213  
SYT11|23208  
TAGLN|6876  
TGFB3|7043  
THY1|7070  
TIMP2|7077  
VASN|114990  
VIM|7431  
ZEB2|9839

>MDA\_classifier

A2M|2  
AADAT|51166  
ABCA12|26154  
ABCA3|21  
ABCA8|10351  
ABCC1|4363  
ABCC4|10257  
ABCD3|5825  
ABHD12|26090  
ABHD14A|25864  
ABI3BP|25890  
ABL1|25  
ACAA1|30  
ACACB|32  
ACADM|34  
ACER2|340485  
ACER3|55331  
ACOT4|122970  
ACOT7|11332  
ACOT9|23597  
ACOX1|51  
ACOX2|8309  
ACOXL|55289  
ACP1|52  
ACP5|54  
ACP6|51205  
ACPL2|92370  
ACSBG1|23205  
ACSF2|80221  
ACSL1|2180  
ACSL5|51703  
ACSM3|6296  
ACSS1|84532  
ACTA2|59  
ACTC1|70  
ACTG2|72  
ACTL6A|86  
ACTN1|87  
ACVR2A|92  
ACVRL1|94  
ADA|100  
ADAM10|102  
ADAM19|8728  
ADAM23|8745  
ADAMTS1|9510  
ADAMTS9|56999  
ADAP2|55803  
ADARB1|104  
ADCK2|90956  
ADCY1|107  
ADCY4|196883  
ADCY6|112  
ADH1A|124  
ADH1C|126  
ADHFE1|137872  
ADK|132  
ADORA2B|136  
ADSS|159  
AEBP1|165  
AFAP1|60312



AFF3|3899  
AGFG1|3267  
AGMAT|79814  
AGPAT4|56895  
AGPAT9|84803  
AGPS|8540  
AGR2|10551  
AGTRAP|57085  
AHNAK2|113146  
AHR|196  
AIF1|199  
AIM2|9447  
AK1|203  
AK3|50808  
AK3L1|205  
AKIRIN1|79647  
AKIRIN2|55122  
AKR1C2|1646  
AKR1C3|8644  
AKTIP|64400  
ALDH1A2|8854  
ALDH1B1|219  
ALDH2|217  
ALDH4A1|8659  
ALDH5A1|7915  
ALDH7A1|501  
ALDOA|226  
ALOX12B|242  
ALOX5|240  
ALOX5AP|241  
ALPK2|115701  
AMACR|23600  
AMOT|154796  
AMT|275  
ANGPTL2|23452  
ANKDD1A|348094  
ANKRD29|147463  
ANKRD35|148741  
ANKRD46|157567  
ANKRD6|22881  
ANKS1A|23294  
ANLN|54443  
ANPEP|290  
ANTXR1|84168  
ANTXR2|118429  
ANXA1|301  
ANXA2|302  
ANXA2P1|303  
ANXA2P3|305  
ANXA4|307  
ANXA5|308  
ANXA6|309  
ANXA8L1|728113  
ANXA9|8416  
AOC3|8639  
AP1S1|1174  
AP1S2|8905  
APCDD1L|164284  
APEX2|27301  
APLNR|187  
APOBEC3G|60489  
APOD|347  
APOL4|80832  
AQP1|358  
AQP9|366  
ARHGAP1|392  
ARHGAP21|57584  
ARHGAP22|58504  
ARHGAP23|57636  
ARHGAP32|9743  
ARHGAP9|64333  
ARHGEF1|9138  
ARHGEF10|9639  
ARHGEF17|9828  
ARHGEF2|9181  
ARHGEF4|50649  
ARL14|80117  
ARL6IP1|23204  
ARL6IP5|10550  
ARL6IP6|151188  
ARNTL|406  
ASAM|79827

ASAP1|50807  
ASAP3|55616  
ASB5|140458  
ASCC2|84164  
ASCC3|10973  
ASPM|259266  
ASTN2|23245  
ATAD2|29028  
ATF7IP2|80063  
ATG9A|79065  
ATL2|64225  
ATL3|25923  
ATP10B|23120  
ATP1A1|476  
ATP1A2|477  
ATP1B3|483  
ATP2A2|488  
ATP2B4|493  
ATP2C1|27032  
ATP5C1|509  
ATP6AP1|537  
ATP6VOE2|155066  
ATP6V1B2|526  
ATP8B1|5205  
ATP8B2|57198  
ATP8B4|79895  
ATR|545  
ATXN1|6310  
AURKA|6790  
AURKB|9212  
AXIN2|8313  
AXL|558  
B3GALNT1|8706  
B4GALT3|8703  
B4GALT4|8702  
BAG3|9531  
BAMBI|25805  
BANK1|55024  
BATF|10538  
BATF2|116071  
BCAS1|8537  
BCAT2|587  
BCKDHB|594  
BCL11B|64919  
BCL3|602  
BEND5|79656  
BEX2|84707  
BEX4|56271  
BGN|633  
BHLHE40|8553  
BHLHE41|79365  
BHMT|635  
BICD2|23299  
BIN1|274  
BMP1|649  
BMP3|651  
BMP4|652  
BNC1|646  
BNC2|54796  
BPGM|669  
BPHL|670  
BRAF|673  
BRX1|55299  
BTBD1|53339  
BTBD16|118663  
BTG2|7832  
BTG3|10950  
BUB1|699  
BZW1|9689  
BZW2|28969  
C10orf11|83938  
C10orf116|10974  
C10orf35|219738  
C10orf58|84293  
C11orf1|64776  
C11orf52|91894  
C11orf54|28970  
C11orf82|220042  
C13orf34|79866  
C14orf129|51527  
C14orf149|112849  
C15orf17|57184

C15orf23|90417  
C17orf28|283987  
C17orf58|284018  
C17orf82|388407  
C18orf19|125228  
C18orf34|374864  
C19orf2|8725  
C19orf46|163183  
C19orf56|51398  
C19orf59|199675  
C1orf116|79098  
C1orf162|128346  
C1orf198|84886  
C1orf43|25912  
C1orf53|388722  
C1orf54|79630  
C1QA|712  
C1QB|713  
C1QC|714  
C1QTNF1|114897  
C1R|715  
C1S|716  
C20orf24|55969  
C21orf2|755  
C21orf34|388815  
C21orf63|59271  
C21orf81|391267  
C22orf32|91689  
C22orf36|388886  
C2CD2|25966  
C2orf15|150590  
C2orf18|54978  
C2orf40|84417  
C2orf55|343990  
C2orf64|493753  
C3AR1|719  
C3orf10|55845  
C3orf19|51244  
C3orf23|285343  
C3orf38|285237  
C3orf57|165679  
C3orf58|205428  
C4orf19|55286  
C4orf34|201895  
C5AR1|728  
C5orf13|9315  
C5orf39|389289  
C5orf4|10826  
C6orf141|135398  
C6orf150|115004  
C7|730  
C7orf10|79783  
C7orf23|79161  
C7orf28A|51622  
C7orf28B|221960  
C7orf41|222166  
C7orf46|340277  
C7orf55|154791  
C7orf58|79974  
C7orf68|29923  
C8orf47|203111  
C8orf55|51337  
C8orf84|157869  
C9orf116|138162  
C9orf140|89958  
C9orf21|195827  
C9orf30|91283  
C9orf46|55848  
CA2|760  
CA9|768  
CAB39L|81617  
CABC1|56997  
CACNA1H|8912  
CACNA1I|8911  
CACNB3|784  
CADPS2|93664  
CALB2|794  
CALD1|800  
CAMK1|8536  
CAMK2G|818  
CAMK2N1|55450  
CAP2|10486

CAPN5|726  
CAPN9|10753  
CAPS|828  
CARD10|29775  
CARD11|84433  
CARD17|440068  
CASC4|113201  
CASP1|834  
CASP14|23581  
CASP6|839  
CASQ1|844  
CASQ2|845  
CAV1|857  
CAV2|858  
CBARA1|10367  
CBLN2|147381  
CBX7|23492  
CBY1|25776  
CCDC102A|92922  
CCDC106|29903  
CCDC109B|55013  
CCDC3|83643  
CCDC34|91057  
CCDC86|79080  
CCDC92|80212  
CCL15|6359  
CCL19|6363  
CCL21|6366  
CCL3|6348  
CCL8|6355  
CCNA2|890  
CCNB1|891  
CCNB2|9133  
CCNC|892  
CCND2|894  
CCNDBP1|23582  
CCNE1|898  
CCNE2|9134  
CCNG1|900  
CCNG2|901  
CCNYL1|151195  
CCR1|1230  
CCT6A|908  
CCT7|10574  
CD109|135228  
CD14|929  
CD163|9332  
CD1A|909  
CD248|57124  
CD2AP|23607  
CD300A|11314  
CD34|947  
CD44|960  
CD46|4179  
CD53|963  
CD55|1604  
CD58|965  
CD63|967  
CD68|968  
CD7|924  
CD74|972  
CD82|3732  
CD83|9308  
CD84|8832  
CD86|942  
CD9|928  
CD99L2|83692  
CDA|978  
CDC25B|994  
CDC42|998  
CDCA4|55038  
CDCA5|113130  
CDCA7L|55536  
CDCA8|55143  
CDCP1|64866  
CDH11|1009  
CDH13|1012  
CDH23|64072  
CDH26|60437  
CDH3|1001  
CDK1|983  
CDK20|23552

CDK5R1|8851  
CDK6|1021  
CDKN3|1033  
CDR2|1039  
CDSN|1041  
CEBPA|1050  
CEBPB|1051  
CECR7|100130418  
CELSR2|1952  
CENPA|1058  
CENPE|1062  
CENPK|64105  
CENPL|91687  
CENPN|55839  
CENPV|201161  
CENPW|387103  
CERCAM|51148  
CERK|64781  
CES1|1066  
CFB|629  
CFD|1675  
CFI|3426  
CFLAR|8837  
CGN|57530  
CGNL1|84952  
CHCHD7|79145  
CHEK1|1111  
CHN1|1123  
CHN2|1124  
CHP2|63928  
CHPF|79586  
CHPT1|56994  
CHRD12|25884  
CHST15|51363  
CHST3|9469  
CHST7|56548  
CHSY3|337876  
CILP|8483  
CIRBP|1153  
CKAP2|26586  
CKAP2L|150468  
CKAP4|10970  
CKS1B|1163  
CKS2|1164  
CLCA2|9635  
CLCF1|23529  
CLDN14|23562  
CLDN23|137075  
CLDN5|7122  
CLDN7|1366  
CLEC11A|6320  
CLEC14A|161198  
CLEC2D|29121  
CLEC3B|7123  
CLEC4A|50856  
CLEC5A|23601  
CLIC4|25932  
CLIC6|54102  
CLIP3|25999  
CLSTN1|22883  
CMTM4|146223  
CMTM6|54918  
CMTM8|152189  
CMYA5|202333  
CNGA1|1259  
CNIH|10175  
CNN1|1264  
CNN3|1266  
CNTN1|1272  
CNTNAP1|8506  
COL14A1|7373  
COL15A1|1306  
COL16A1|1307  
COL18A1|80781  
COL1A1|1277  
COL1A2|1278  
COL27A1|85301  
COL3A1|1281  
COL4A1|1282  
COL4A2|1284  
COL5A1|1289  
COL5A2|1290

COL5A3|50509  
COL6A1|1291  
COL6A2|1292  
COL6A3|1293  
COL7A1|1294  
COL8A2|1296  
COLEC12|81035  
COMMD2|51122  
COMMD7|149951  
COMMD8|54951  
COMP|1311  
COPZ2|51226  
CORO1C|23603  
COX19|90639  
COX6B1|1340  
COX7A1|1346  
CPA4|51200  
CPE|1363  
CPNE8|144402  
CPXM1|56265  
CPXM2|119587  
CRB3|92359  
CRBN|51185  
CREB3L2|64764  
CREB5|9586  
CRH|1392  
CRISPLD2|83716  
CRLF3|51379  
CROT|54677  
CRY2|1408  
CRYAB|1410  
CRYL1|51084  
CRYZL1|9946  
CSDC2|27254  
CSF1R|1436  
CSPG4|1464  
CSRNP1|64651  
CSRP1|1465  
CSTA|1475  
CTGF|1490  
CTHRC1|115908  
CTPS2|56474  
CTSB|1508  
CTSC|1075  
CTSD|1509  
CTSE|1510  
CTSF|8722  
CTSG|1511  
CTSH|1512  
CTSK|1513  
CTSL1|1514  
CTSL2|1515  
CTTN|2017  
CX3CL1|6376  
CXADR|1525  
CXCL1|2919  
CXCL10|3627  
CXCL12|6387  
CXCL2|2920  
CXCL5|6374  
Cxorf38|159013  
Cxorf57|55086  
CYB5A|1528  
CYBB|1536  
CYBRD1|79901  
CYCS|54205  
CYFIP2|26999  
CYGB|114757  
CYP26B1|56603  
CYP27A1|1593  
CYP27B1|1594  
CYP2J2|1573  
CYP3A5|1577  
CYP4B1|1580  
CYP4F12|66002  
CYP4F22|126410  
CYP4F8|11283  
CYR61|3491  
CYTH1|9267  
CYTH4|27128  
CYXR1|116159  
DACT1|51339

DACT3|147906  
DAPK1|1612  
DARC|2532  
DBI|1622  
DBN1|1627  
DCAKD|79877  
DCBLD1|285761  
DCBLD2|131566  
DCTPP1|79077  
DCUN1D5|84259  
DDAH1|23576  
DDIT3|1649  
DDIT4L|115265  
DDR2|4921  
DDX21|9188  
DDX60|55601  
DECR1|1666  
DEGS1|8560  
DENND1A|57706  
DENND2A|27147  
DENND2D|79961  
DENND4C|55667  
DENND5A|23258  
DEPDC1|55635  
DEPDC6|64798  
DES|1674  
DFNA5|1687  
DGAT2|84649  
DHRS11|79154  
DHRS2|10202  
DIAPH3|81624  
DIRC2|84925  
DIS3L|115752  
DISP1|84976  
DIXDC1|85458  
DKK3|27122  
DKK4|27121  
DLC1|10395  
DLG4|1742  
DLGAP5|9787  
DLL1|28514  
DMAP1|55929  
DNAJA4|55466  
DNAJB5|25822  
DNAL4|10126  
DNAL1|7802  
DOCK10|55619  
DONSON|29980  
DPH3|285381  
DPM1|8813  
DPM3|54344  
DPP7|29952  
DPT|1805  
DPYD|1806  
DPYSL2|1808  
DPYSL3|1809  
DRAP1|10589  
DSC2|1824  
DSC3|1825  
DSCR6|53820  
DSE|29940  
DSG3|1830  
DSP|1832  
DTNA|1837  
DUSP14|11072  
DUSP3|1845  
DYNC1I1|1780  
DYNC2L1|51626  
DYSF|8291  
E2F7|144455  
EBF1|1879  
EBF3|253738  
ECE2|9718  
ECHDC2|55268  
ECHS1|1892  
ECM1|1893  
ECM2|1842  
EDARADD|128178  
EDNRA|1909  
EDNRB|1910  
EEF1E1|9521  
EFCAB4A|283229

EFEMP1|2202  
EGFR|1956  
EGR1|1958  
EGR2|1959  
EHD2|30846  
EHF|26298  
EIF2AK3|9451  
EIF4E3|317649  
ELF3|1999  
ELF5|2001  
ELL2|22936  
ELMO1|9844  
ELN|2006  
ELOVL6|79071  
ELP3|55140  
EMILIN1|11117  
EMP3|2014  
EMR2|30817  
EMX2|2018  
ENG|2022  
ENO1|2023  
ENPP4|22875  
ENPP5|59084  
ENSA|2029  
ENTPD1|953  
ENTPD3|956  
EPB41L2|2037  
EPCAM|4072  
EPDR1|54749  
EPHA1|2041  
EPHA3|2042  
EPN3|55040  
EPS8|2059  
EPST1|94240  
ERBB2|2064  
ERBB3|2065  
ERMP1|79956  
ERO1L|30001  
ERP27|121506  
ESPN|83715  
ESRP1|54845  
ETFA|2108  
ETV5|2119  
EVC|2121  
EVL|51466  
EVPL|2125  
EXO1|9156  
EXOG|9941  
EXT1|2131  
EZH2|2146  
F12|2161  
F3|2152  
FAAH|2166  
FABP5|2171  
FABP6|2172  
FADD|8772  
FAM101B|359845  
FAM107A|11170  
FAM107B|83641  
FAM108B1|51104  
FAM129A|116496  
FAM13A|10144  
FAM13B|51306  
FAM149A|25854  
FAM150A|389658  
FAM164A|51101  
FAM171A1|221061  
FAM174B|400451  
FAM176A|84141  
FAM181B|220382  
FAM189A2|9413  
FAM196A|642938  
FAM198B|51313  
FAM20C|56975  
FAM38A|9780  
FAM3B|54097  
FAM43A|131583  
FAM46B|115572  
FAM57A|79850  
FAM59A|64762  
FAM63A|55793  
FAM64A|54478



FAM65A|79567  
FAM69B|138311  
FAM83A|84985  
FAM84B|157638  
FAM91A1|157769  
FANCD2|2177  
FANCL|55120  
FAP|2191  
FARP1|10160  
FAT2|2196  
FBLN1|2192  
FBLN5|10516  
FBP1|2203  
FBXO2|26232  
FBXO5|26271  
FCER1A|2205  
FCER1G|2207  
FCGR1A|2209  
FCGR1B|2210  
FCGR2A|2212  
FCHO1|23149  
FCN3|8547  
FCRLB|127943  
FDF1|2222  
FEN1|2237  
FER1L4|80307  
FERMT2|10979  
FERMT3|83706  
FFAR2|2867  
FGD1|2245  
FGD2|221472  
FGD3|89846  
FGD5|152273  
FGF9|2254  
FGFBP1|9982  
FHL1|2273  
FHOD1|29109  
FILIP1L|11259  
FJX1|24147  
FKBP2|2286  
FKBP5|2289  
FLNC|2318  
FLRT2|23768  
FLRT3|23767  
FMO5|2330  
FMO9P|116123  
FMOD|2331  
FNBP1|23048  
FNBP1L|54874  
FNDC1|84624  
FOSL1|8061  
FOXA1|3169  
FOXO1|2297  
FOXF1|2294  
FOXO4|4303  
FOXQ1|94234  
FPR1|2357  
FPR2|2358  
FPR3|2359  
FRAS1|80144  
FRAT2|23401  
FREM2|341640  
FRMD3|257019  
FRMD6|122786  
FRZB|2487  
FSCN1|6624  
FSTL3|10272  
FUCA1|2517  
FUK|197258  
FUT9|10690  
FXD3|5349  
FXD4|53828  
FXD6|53826  
FYB|2533  
FYCO1|79443  
FYN|2534  
FZD3|7976  
FZD7|8324  
GOS2|50486  
GABARAPL1|23710  
GABBR1|2550

GABBR2|9568  
GALNT1|2589  
GALNT11|63917  
GALNT12|79695  
GAMT|2593  
GAPDH|2597  
GARNL3|84253  
GAS1|2619  
GAS6|2621  
GAS7|8522  
GATA2|2624  
GATA3|2625  
GATA5|140628  
GATM|2628  
GATS|352954  
GBP1|2633  
GBPS|115362  
GBP6|163351  
GCLC|2729  
GCLM|2730  
GCOM1|145781  
GDF15|9518  
GDPD3|79153  
GEM|2669  
GF11|2672  
GFOD1|54438  
GFPT2|9945  
GGCT|79017  
GGCX|2677  
GGH|8836  
GGT6|124975  
GIMAP4|55303  
GIMAP5|55340  
GIMAP8|155038  
GJB2|2706  
GK|2710  
GLB1L2|89944  
GLIPR1|11010  
GLIPR2|152007  
GLT25D1|79709  
GLT8D2|83468  
GLTP|51228  
GLTSCR2|29997  
GMCL1|64395  
GMFG|9535  
GNA15|2769  
GNB4|59345  
GNG4|2786  
GNL3|26354  
GNLY|10578  
GOLT1A|127845  
GPBAR1|151306  
GPC1|2817  
GPD1L|23171  
GPER|2852  
GPIHBP1|338328  
GPM6B|2824  
GPR110|266977  
GPR115|221393  
GPR124|25960  
GPR160|26996  
GPR162|27239  
GPR37|2861  
GPR68|8111  
GPR81|27198  
GPR89B|51463  
GPRC5C|55890  
GPSM1|26086  
GPSM2|29899  
GPX3|2878  
GRAMD1A|57655  
GRAMD1C|54762  
GRAP|10750  
GRB10|2887  
GRB2|2885  
GRB7|2886  
GREM1|26585  
GRHL3|57822  
GRK5|2869  
GSDMB|55876  
GSDMC|56169  
GSN|2934

GSTM1|2944  
GSTM3|2947  
GSTM4|2948  
GSTO1|9446  
GTF2|2969  
GUCA2A|2980  
GUCY1A3|2982  
GYG2|8908  
GYPC|2995  
H2AFX|3014  
H2AFY|9555  
H3F3B|3021  
HACL1|26061  
HADH|3033  
HAND1|9421  
HAPLN3|145864  
HAS3|3038  
HAVCR2|84868  
HBEGF|1839  
HCFC1R1|54985  
HCG4|54435  
HCK|3055  
HCP5|10866  
HCST|10870  
HDC|3067  
HEG1|57493  
HEPH|9843  
HERC5|51191  
HERC6|55008  
HES1|3280  
HES2|54626  
HEYL|26508  
HIBCH|26275  
HIC2|23119  
HIF1A|3091  
HIGD1A|25994  
HIPK2|28996  
HIST1H2BK|85236  
HIST3H2A|92815  
HJURP|55355  
HK3|3101  
HLA-A|3105  
HLA-B|3106  
HLA-E|3133  
HLA-F|3134  
HLA-G|3135  
HLA-H|3136  
HLTF|6596  
HM13|81502  
HMGA1|3159  
HMGB3|3149  
HMGCS2|3158  
HMMR|3161  
HNF1B|6928  
HNMT|3176  
HNRNPA1|3178  
HNRPDL|9987  
HOMER2|9455  
HOPX|84525  
HOXA13|3209  
HOXA5|3202  
HOXB5|3215  
HOXD10|3236  
HPGD|3248  
HPRT1|3251  
HPSS|11234  
HPSE|10855  
HS3ST3A1|9955  
HS6ST2|90161  
HSCB|150274  
HSD17B11|51170  
HSD17B6|8630  
HSPA12A|259217  
HSPA12B|116835  
HSPA4L|22824  
HSPA6|3310  
HSPA8|3312  
HSPB2|3316  
HSPB6|126393  
HSPB7|27129  
HSPB8|26353  
HTRA1|5654

HYAL1|3373  
ICA1|3382  
IDH1|3417  
IER3|8870  
IER5|51278  
IFFO1|25900  
IFI16|3428  
IFI27|3429  
IFI27L2|83982  
IFI30|10437  
IFI35|3430  
IFI44|10561  
IFIH1|64135  
IFIT1|3434  
IFIT2|3433  
IFIT3|3437  
IFITM1|8519  
IFITM2|10581  
IFITM3|10410  
IFT122|55764  
IFT27|11020  
IGDCC3|9543  
IGF1|3479  
IGF2BP2|10644  
IGF2R|3482  
IGFBP3|3486  
IGFBP5|3488  
IGFBP6|3489  
IGFL1|374918  
IGSF11|152404  
IGSF6|10261  
IL11RA|3590  
IL15|3600  
IL17D|53342  
IL18BP|10068  
IL1B|3553  
IL1F9|56300  
IL1R2|7850  
IL1RAP|3556  
IL1RN|3557  
IL20RB|53833  
IL24|11009  
IL27RA|9466  
IL28B|282617  
IL32|9235  
IL41|259307  
IL4R|3566  
IL6|3569  
IL7R|3575  
IL8|3576  
ILDR1|286676  
ILF2|3608  
ILK|3611  
ILVBL|10994  
IMPDH1|3614  
INA|9118  
INMT|11185  
INPPL1|3636  
IP6K2|51447  
IPPK|64768  
IQCB1|9657  
IRAK3|11213  
IRF7|3665  
ISG20|3669  
ISLR|3671  
ISYNA1|51477  
ITGA3|3675  
ITGA5|3678  
ITGA6|3655  
ITGA8|8516  
ITGAM|3684  
ITGAX|3687  
ITGB2|3689  
ITGB5|3693  
ITM2C|81618  
ITPKA|3706  
ITPR3|3710  
ITPRIP|85450  
ITSN1|6453  
JAG1|182  
JAG2|3714  
JAM2|58494

JAM3|83700  
JARID2|3720  
JAZF1|221895  
JPH2|57158  
JUN|3725  
KANK1|23189  
KANK2|25959  
KATNAL1|84056  
KBTBD11|9920  
KCNAB1|7881  
KCNG1|3755  
KCNJ8|3764  
KCNMA1|3778  
KCNMB1|3779  
KCTD12|115207  
KCTD14|65987  
KCTD15|79047  
KDELR2|11014  
KIAA0101|9768  
KIAA0247|9766  
KIAA0922|23240  
KIAA1244|57221  
KIAA1324L|222223  
KIAA1370|56204  
KIAA1467|57613  
KIAA1522|57648  
KIAA1598|57698  
KIAA1644|85352  
KIAA1949|170954  
KIF11|3832  
KIF14|9928  
KIF1B|23095  
KIF20A|10112  
KIF23|9493  
KIF4A|24137  
KIF5C|3800  
KIFC1|3833  
KLC3|147700  
KLF13|51621  
KLF2|10365  
KLF9|687  
KLHDC9|126823  
KLHL22|84861  
KLHL24|54800  
KLHL3|26249  
KLHL5|51088  
KLK10|5655  
KLK11|11012  
KLK12|43849  
KLK13|26085  
KLK5|25818  
KLK6|5653  
KLK7|5650  
KLK8|11202  
KPNA2|3838  
KREMEN2|79412  
KRT1|3848  
KRT14|3861  
KRT16|3868  
KRT18|3875  
KRT19|3880  
KRT20|54474  
KRT34|3885  
KRT5|3852  
KRT6A|3853  
KRT6B|3854  
KRT6C|286887  
KRT7|3855  
KRT8|3856  
KRT81|3887  
LAG3|3902  
LAMA1|284217  
LAMA3|3909  
LAMA4|3910  
LAMA5|3911  
LAMB1|3912  
LAMB2|3913  
LAMC2|3918  
LAMP2|3920  
LAP3|51056  
LAPTM5|7805  
LARGE|9215

LARP1B|55132  
LARP6|55323  
LAT2|7462  
LAYN|143903  
LCOR|84458  
LDB2|9079  
LDHA|3939  
LEPR|3953  
LEPRE1|64175  
LEPREL2|10536  
LFNG|3955  
LGALS1|3956  
LGALS7|3963  
LHFP|10186  
LILRA3|11026  
LILRA5|353514  
LILRB2|10288  
LILRB3|11025  
LILRB4|11006  
LIMCH1|22998  
LIMS2|55679  
LMBRD1|55788  
LMCD1|29995  
LMF2|91289  
LMNA|4000  
LMNB2|84823  
LMO3|55885  
LMOD1|25802  
LOC100133331|100133331  
LONP2|83752  
LOX|4015  
LPAR1|1902  
LPAR2|9170  
LPAR5|57121  
LPP|4026  
LRFN2|57497  
LRFN4|78999  
LRFN5|145581  
LRIG1|26018  
LRMP|4033  
LRP11|84918  
LRP5|4041  
LRP8|7804  
LRRC1|55227  
LRRC17|10234  
LRRC32|2615  
LRRC8A|56262  
LRRC8C|84230  
LSM12|124801  
LSM3|27258  
LTB4R|1241  
LTB4R2|56413  
LTBP4|8425  
LY6D|8581  
LY86|9450  
LY96|23643  
LYAR|55646  
LYL1|4066  
LYN|4067  
LYNX1|66004  
LYPD6|130574  
LYPLA1|10434  
LYPLA2P1|653639  
LYRM1|57149  
LZTFL1|54585  
LZTS1|11178  
MAD2L1|4085  
MAD2L2|10459  
MAF|4094  
MAL|4118  
MAL2|114569  
MAMDC2|256691  
MAN1C1|57134  
MAN2B2|23324  
MANSC1|54682  
MAOA|4128  
MAOB|4129  
MAP1A|4130  
MAP1B|4131  
MAP2K1|5604  
MAP3K6|9064  
MAP4K3|8491

MAP7D1|55700  
MAPK10|5602  
MAPK13|5603  
MAPKAP1|79109  
MAPRE2|10982  
MATN2|4147  
MBNL2|10150  
MCCC1|56922  
MCCC2|64087  
MCL1|4170  
MCM4|4173  
MCM7|4176  
MCTP1|79772  
ME1|4199  
ME3|10873  
MECOM|2122  
MED27|9442  
MEF2C|4208  
MEG3|55384  
MEIS1|4211  
MEIS2|4212  
MEIS3P1|4213  
MELK|9833  
MEST|4232  
METRNL|284207  
METTL7A|25840  
MFAP2|4237  
MFAP4|4239  
MFAP5|8076  
MFG8|4240  
MFI2|4241  
MFMG|4242  
MGAT3|4248  
MGAT4A|11320  
MGAT4B|11282  
MGLL|11343  
MGMT|4255  
MGP|4256  
MGST1|4257  
MGST2|4258  
MICAL1|64780  
MICB|4277  
MLKL|197259  
MMEL1|79258  
MMP1|4312  
MMP11|4320  
MMP12|4321  
MMP23A|8511  
MMP23B|8510  
MMP25|64386  
MMP7|4316  
MMP9|4318  
MN1|4330  
MNDA|4332  
MOBK2A|126308  
MOBK2B|79817  
MOCS1|4337  
MORN2|729967  
MOSC1|64757  
MOV10|4343  
MOXD1|26002  
MPP1|4354  
MPP6|51678  
MPRI1|23164  
MPZL2|10205  
MRGPRF|116535  
MRPL3|11222  
MRPL36|64979  
MRPS21|54460  
MRPS25|64432  
MRPS30|10884  
MRS2|57380  
MSC|9242  
MSI2|124540  
MSN|4478  
MSRB2|22921  
MSRB3|253827  
MST1|4485  
MST4|51765  
MSX2|4488  
MT1A|4489  
MT1E|4493

MT1F|4494  
MT1G|4495  
MT1IP|644314  
MT1M|4499  
MT1X|4501  
MT2A|4502  
MTFR1|9650  
MTHFD2|10797  
MTMR11|10903  
MTUS1|57509  
MUC20|200958  
MUSK|4593  
MUSTN1|389125  
MXD4|10608  
MXRA5|25878  
MXRA7|439921  
MXRA8|54587  
MYADM|91663  
MYC|4609  
MYCL1|4610  
MYCN|4613  
MYEOV|26579  
MYH11|4629  
MYL9|10398  
MYLIP|29116  
MYLK|4638  
MYO10|4651  
MYO1B|4430  
MYO1G|64005  
MYO5A|4644  
MYO5B|4645  
MYO5C|55930  
MYOM1|8736  
MYOM2|9172  
N4BP2L2|10443  
NACAD|23148  
NADSYN1|55191  
NAV1|89796  
NBL1|4681  
NCALD|83988  
NCAM1|4684  
NCAPG|64151  
NCAPG2|54892  
NCF1|653361  
NCK1|4690  
NCOA1|8648  
NCOA7|135112  
NCOR2|9612  
NCRNA00152|112597  
NCS1|23413  
NDC80|10403  
NDFIP2|54602  
NDN|4692  
NDRG2|57447  
NDST1|3340  
NEDD4L|23327  
NEDD9|4739  
NEIL3|55247  
NEK6|10783  
NELF|26012  
NES|10763  
NET1|10276  
NETO2|81831  
NEXN|91624  
NFE2L1|4779  
NFIA|4774  
NFIB|4781  
NFIC|4782  
NFIK|4784  
NFXL1|152518  
NGLY1|55768  
NHP2L1|4809  
NHS|4810  
NINJ1|4814  
NINJ2|4815  
NIP7|51388  
NIPAL1|152519  
NIPSNAP1|8508  
NISCH|11188  
NLRC5|84166  
NLRP3|114548  
NMB|4828



NMD3|51068  
NME1|4830  
NME2|4831  
NME3|4832  
NMT2|9397  
NMU|10874  
NNMT|4837  
NOD2|64127  
NOS3|4846  
NOSTRIN|115677  
NOTCH1|4851  
NOTCH4|4855  
NOV|4856  
NOX4|50507  
NPAS2|4862  
NPC1|4864  
NPRL2|10641  
NPTX1|4884  
NR1H3|10062  
NR2F2|7026  
NR2F6|2063  
NR3C2|4306  
NRARP|441478  
NRG1|3084  
NRXN2|9379  
NT5C2|22978  
NT5E|4907  
NTAN1|123803  
NTN4|59277  
NUAK1|9891  
NUAK2|81788  
NUDT1|55190  
NUMA1|4926  
NUP155|9631  
NUP188|23511  
NUP50|10762  
NUPR1|26471  
NUSAP1|51203  
NXN|64359  
OAF|220323  
OAS2|4939  
OASL|8638  
OBFC2A|64859  
ODZ3|55714  
OGN|4969  
OIP5|11339  
OLFM1|10439  
OLFML1|283298  
OLFML2B|25903  
OLFML3|56944  
OPN3|23596  
OR13A1|79290  
OR7E91P|79315  
ORC6L|23594  
ORMDL3|94103  
OSBP2|23762  
OSBP5|114879  
OSCAR|126014  
OSM|5008  
OSMR|9180  
OSR1|130497  
OSTC|58505  
OSTF1|26578  
OVGP1|5016  
OVOL2|58495  
OXCT1|5019  
OXR1|55074  
P2RX1|5023  
P2RY6|5031  
P4HA2|8974  
P4HTM|54681  
PABPC1|26986  
PABPC3|5042  
PABPC4|8761  
PACIN1|29993  
PADI3|51702  
PAFAH1B3|5050  
PAICS|10606  
PAK2|5062  
PALLD|23022  
PALM|5064  
PAM|5066

PAMR1|25891  
PANX1|24145  
PAPLN|89932  
PAPSS2|9060  
PAQR4|124222  
PAQR7|164091  
PAQR8|85315  
PARD6G|84552  
PARM1|25849  
PARP10|84875  
PARP12|64761  
PARP9|83666  
PARVB|29780  
PARVG|64098  
PBX1|5087  
PC|5091  
PCBD1|5092  
PCDH17|27253  
PCDH18|54510  
PCDH7|5099  
PCMTD1|115294  
PCNA|5111  
PCNX|22990  
PCOLCE|5118  
PCOLCE2|26577  
PCP4|5121  
PCP4L1|654790  
PCSK5|5125  
PDCD10|11235  
PDE1A|5136  
PDE4B|5142  
PDE5A|8654  
PDE7B|27115  
PDE9A|5152  
PDGFC|56034  
PDGFD|80310  
PDGFRA|5156  
PDGFRB|5159  
PDIK1L|149420  
PDK4|5166  
PDLIM3|27295  
PDLIM7|9260  
PDPN|10630  
PDSS1|23590  
PDZK1P1|10158  
PEBP1|5037  
PECAM1|5175  
PEG3|5178  
PEPD|5184  
PEX13|5194  
PFKFB3|5209  
PFKP|5214  
PGAM1|5223  
PGAM4|441531  
PGAM5|192111  
PGAP1|80055  
PGAP3|93210  
PGCP|10404  
PGF|5228  
PGK1|5230  
PGM1|5236  
PGM2|55276  
PGM2L1|283209  
PGM5|5239  
PGRMC2|10424  
PHLDA1|22822  
PHLDA2|7262  
PHLDB1|23187  
PHOSPHO2|493911  
PHYH|5264  
PI16|221476  
PI3|5266  
PI4KA|5297  
PI4KAP1|728233  
PI4KAP2|375133  
PICK1|9463  
PIGF|5281  
PIGM|93183  
PIGN|23556  
PIGQ|9091  
PIK3C2B|5287  
PIK3CD|5293

PIK3IP1|113791  
PIK3R1|5295  
PIM1|5292  
PIR|8544  
PITX1|5307  
PJA2|9867  
PKD1|5310  
PKHD1|5314  
PKIA|5569  
PKM2|5315  
PKMYT1|9088  
PKP1|5317  
PLA2G2F|64600  
PLA2G4C|8605  
PLA2G4E|123745  
PLA2G7|7941  
PLAC9|219348  
PLAU|5328  
PLAUR|5329  
PLCB1|23236  
PLCD1|5333  
PLCE1|51196  
PLCL2|23228  
PLEC|5339  
PLEK|5341  
PLEK2|26499  
PLEKHA4|57664  
PLEKHA6|22874  
PLEKHA7|144100  
PLEKHB2|55041  
PLEKHG6|55200  
PLEKHH1|57475  
PLEKHO1|51177  
PLEKHO2|80301  
PLIN3|10226  
PLIN4|729359  
PLK4|10733  
PLLP|51090  
PLN|5350  
PLOD1|5351  
PLOD2|5352  
PLS1|5357  
PLSCR4|57088  
PLXDC2|84898  
PLXNB1|5364  
PM20D1|148811  
PMAIP1|5366  
PMEPA1|56937  
PNCK|139728  
PNP|4860  
PNPLA7|375775  
PNRC2|55629  
PODN|127435  
PODXL|5420  
POGK|57645  
POLE2|5427  
POLR2J4|84820  
POSTN|10631  
PPAP2A|8611  
PPARG|5468  
PPFIA1|8500  
PPFIBP2|8495  
PPIL1|51645  
PPIL5|122769  
PPM1H|57460  
PPOX|5498  
PPP1CA|5499  
PPP1R13B|23368  
PPP1R14A|94274  
PPP1R14C|81706  
PPP1R3C|5507  
PPP1R9A|55607  
PPP2R2B|5521  
PPP2R2C|5522  
PPP4R1|9989  
PPPDE2|27351  
PRC1|9055  
PRDM1|639  
PRDX2|7001  
PRF1|5551  
PRIC285|85441  
PRICKLE1|144165

PRIM1|5557  
PRIM2|5558  
PRKCD|5580  
PRKCDBP|112464  
PRKCQ|5588  
PRKD1|5587  
PRND|23627  
PRNP|5621  
PROK2|60675  
PRR11|55771  
PRR15L|79170  
PRR5L|79899  
PRRG2|5639  
PRRT2|112476  
PRRX1|5396  
PRSS16|10279  
PRUNE2|158471  
PSCA|8000  
PSMA1|5682  
PSMA6|5687  
PSMB8|5696  
PSMB9|5698  
PSMC4|5704  
PSMD1|5707  
PSMD12|5718  
PSMD7|5713  
PSMG2|56984  
PTCHD1|139411  
PTGIS|5740  
PTGS1|5742  
PTH1R|5745  
PTHLH|5744  
PTK6|5753  
PTMS|5763  
PTN|5764  
PTP4A1|7803  
PTP4A2|8073  
PTP4A3|11156  
PTPLA|9200  
PTPLAD1|51495  
PTPN12|5782  
PTPRD|5789  
PTPRE|5791  
PTPRM|5797  
PTPRR|5801  
PTPRU|10076  
PTPRZ1|5803  
PTRF|284119  
PTTG1|9232  
PTTG2|10744  
PTTG3P|26255  
PVRL4|81607  
PWWP2B|170394  
PXDN|7837  
PYGB|5834  
QARS|5859  
RAB11A|8766  
RAB11FIP1|80223  
RAB11FIP4|84440  
RAB15|376267  
RAB17|64284  
RAB23|51715  
RAB25|57111  
RAB31|11031  
RAB32|10981  
RAB34|83871  
RAB38|23682  
RAB3IL1|5866  
RAB3IP|117177  
RAB5A|5868  
RAB9B|51209  
RAC2|5880  
RACGAP1|29127  
RAD51AP1|10635  
RAET1G|353091  
RAET1L|154064  
RALBP1|10928  
RALGAPA2|57186  
RALGPS1|9649  
RAMP1|10267  
RANBP1|5902  
RAP1GAP|5909

RARRES1|5918  
RARRES2|5919  
RASAL3|64926  
RASD2|23551  
RASL10A|10633  
RASL11B|65997  
RASL12|51285  
RBBP9|10741  
RBM18|92400  
RBM47|54502  
RBMS1|5937  
RBP1|5947  
RBP7|116362  
RBPMS|11030  
RBPMS2|348093  
RCAN2|10231  
RCE1|9986  
RCN2|5955  
RCN3|57333  
REC8|9985  
RECK|8434  
REEP1|65055  
REEP5|7905  
REEP6|92840  
REL|5966  
RENBP|5973  
REPIN1|29803  
RERE|473  
RERG|85004  
RFC2|5982  
RFC3|5983  
RFC4|5984  
RFTN1|23180  
RFTN2|130132  
RGMA|56963  
RGS16|6004  
RGS2|5997  
RGS20|8601  
RGS4|5999  
RGS5|8490  
RHBDF2|79651  
RHCG|51458  
RHOC|389  
RHOD|29984  
RHOG|391  
RHOJ|57381  
RHPN2|85415  
RNASE7|84659  
RNASET2|8635  
RND3|390  
RNF128|79589  
RNF145|153830  
RNF150|57484  
RNF19A|25897  
RNF19B|127544  
RNF217|154214  
RNFT1|51136  
ROR2|4920  
RPA3|6119  
RPIA|22934  
RPL13A|23521  
RPL14|9045  
RPL29|6159  
RPL36A|6173  
RPL6|6128  
RPLP0|6175  
RPRM|56475  
RPS15|6209  
RPS21|6227  
RPS7|6201  
RRAD|6236  
RRAGB|10325  
RRAS|6237  
RRAS2|22800  
RRBP1|6238  
RRM2|6241  
RSAD2|91543  
RSRC1|51319  
RTN4|57142  
RTTN|25914  
RUNX1T1|862  
RUNX3|864

RXRA|6256  
S100A10|6281  
S100A13|6284  
S100A16|140576  
S100A2|6273  
S100A3|6274  
S100A4|6275  
S100A6|6277  
S100A7|6278  
S100A7A|338324  
S100A8|6279  
S100A9|6280  
S100P|6286  
SAA1|6288  
SAMD9|54809  
SAMD9L|219285  
SAMSNI|64092  
SAP18|10284  
SARM1|23098  
SASH1|23328  
SAT1|6303  
SBK1|388228  
SBNO2|22904  
SBSN|374897  
SC4MOL|6307  
SC65|10609  
SCAP|22937  
SCARA3|51435  
SCARA5|286133  
SCCPDH|51097  
SCD5|79966  
SCIN|85477  
SCMH1|22955  
SCNN1B|6338  
SCNN1D|6339  
SCNN1G|6340  
SCO2|9997  
SCRG1|11341  
SCUBE2|57758  
SDC1|6382  
SDPR|8436  
SEC14L2|23541  
SEH1L|81929  
SELENBP1|8991  
SEMA5A|9037  
SEMA6A|57556  
SERINC2|347735  
SERP2|387923  
SERPINA1|5265  
SERPINA3|12  
SERPINB1|1992  
SERPINB13|5275  
SERPINB2|5055  
SERPINB3|6317  
SERPINB4|6318  
SERPINB7|8710  
SERPINB8|5271  
SERPINE1|5054  
SERPINE2|5270  
SERPINF1|5176  
SERPING1|710  
SERPINH1|871  
SETBP1|26040  
SETMAR|6419  
SFN|2810  
SFRP2|6423  
SFT2D1|113402  
SFYN1|94081  
SGCA|6442  
SGK1|6446  
SGOL1|151648  
SGOL2|151246  
SGPL1|8879  
SGSM1|129049  
SH2B3|10019  
SH2D3C|10044  
SH2D4A|63898  
SH2D5|400745  
SH3BGR2|83699  
SH3BGR3|83442  
SH3BP4|23677  
SH3GL3|6457

SH3GLB2|56904  
SH3PXD2B|285590  
SH3RF2|153769  
SH3TC1|54436  
SH3YL1|26751  
SHANK3|85358  
SHB|6461  
SHC1|6464  
SHROOM1|134549  
SIDT1|54847  
SIDT2|51092  
SIGLEC10|89790  
SIL1|64374  
SILV|6490  
SIRPA|140885  
SKP2|6502  
SLA|6503  
SLC11A1|6556  
SLC14A1|6563  
SLC15A3|51296  
SLC16A3|9123  
SLC16A5|9121  
SLC20A1|6574  
SLC22A17|51310  
SLC22A5|6584  
SLC23A2|9962  
SLC24A3|57419  
SLC25A23|79085  
SLC25A24|29957  
SLC25A28|81894  
SLC25A37|51312  
SLC25A38|54977  
SLC25A42|284439  
SLC25A43|203427  
SLC27A2|11001  
SLC27A3|11000  
SLC28A3|64078  
SLC29A3|55315  
SLC2A10|81031  
SLC2A3|6515  
SLC2A8|29988  
SLC30A2|7780  
SLC31A2|1318  
SLC37A1|54020  
SLC37A4|2542  
SLC38A1|81539  
SLC39A14|23516  
SLC39A6|25800  
SLC39A8|64116  
SLC3A2|6520  
SLC41A3|54946  
SLC43A3|29015  
SLC44A2|57153  
SLC44A3|126969  
SLC44A4|80736  
SLC5A1|6523  
SLC6A9|6536  
SLC7A1|6541  
SLC7A5|8140  
SLC7A7|9056  
SLC9A2|6549  
SLC9A4|389015  
SLC9A9|285195  
SLCO2B1|11309  
SLCO3A1|28232  
SLFN11|91607  
SLIT2|9353  
SLIT3|6586  
SLITRK6|84189  
SLMAP|7871  
SLMO2|51012  
SLPI|6590  
SLTM|79811  
SMAD6|4091  
SMARCC1|6599  
SMARCD3|6604  
SMC2|10592  
SMOC2|64094  
SMOX|54498  
SMTN|6525  
SNAI2|6591  
SNAP91|9892

SNCG|6623  
SNRPN|6638  
SNX31|169166  
SNX4|8723  
SNX5|27131  
SOBP|55084  
SOCS1|8651  
SOCS3|9021  
SOD2|6648  
SORBS1|10580  
SORBS3|10174  
SORD|6652  
SORL1|6653  
SOX13|9580  
SOX7|83595  
SOX9|6662  
SP110|3431  
SPAG4|6676  
SPARC|6678  
SPARCL1|8404  
SPCS1|28972  
SPHK1|8877  
SPHK2|56848  
SPI1|6688  
SPINK1|6690  
SPINT1|6692  
SPINT2|10653  
SPIRE1|56907  
SPIRE2|84501  
SPON1|10418  
SPON2|10417  
SPOP|8405  
SPRED1|161742  
SPRR1B|6699  
SPRR2A|6700  
SPRR2C|6702  
SPRR2D|6703  
SPRR2E|6704  
SPRR2F|6705  
SPRR2G|6706  
SPRY1|10252  
SPRY2|10253  
SPSB1|80176  
SPTLC3|55304  
SQLE|6713  
SRC|6714  
SRDSA1|6715  
SRI|6717  
SRP9|6726  
SRPK1|6732  
SRPX|8406  
SSBP2|23635  
SSCD|284297  
SSH1|54434  
SSH3|54961  
SSPN|8082  
ST3GAL4|6484  
ST3GAL5|8869  
ST5|6764  
ST6GALNAC6|30815  
STAB1|23166  
STAP2|55620  
STARD13|90627  
STAT1|6772  
STAT3|6774  
STAT4|6775  
STIL|6491  
STK36|27148  
STK39|27347  
STMN1|3925  
STOM|2040  
STON1|11037  
STOX2|56977  
STX11|8676  
STX2|2054  
STXBP1|6812  
SULF1|23213  
SULF2|55959  
SULT2A1|6822  
SUMF1|285362  
SUN2|25777  
SUOX|6821



SUV39H1|6839  
SYBU|55638  
SYNC|81493  
SYNGR1|9145  
SYNJ2BP|55333  
SYNM|23336  
SYNPO2|171024  
SYPL1|6856  
SYT11|23208  
SYT15|83849  
SYT17|51760  
SYTL2|54843  
SYTL4|94121  
TAC3|6866  
TACC1|6867  
TACC2|10579  
TADA1|117143  
TAGLN|6876  
TAGLN3|29114  
TAP1|6890  
TAP2|6891  
TARS|6897  
TAX1BP1|8887  
TBC1D2|55357  
TBC1D23|55773  
TBC1D3G|654341  
TBC1D9|23158  
TBL1X|6907  
TBX1|6899  
TBX2|6909  
TBX3|6926  
TBXAS1|6916  
TC2N|123036  
TCEA2|6919  
TCEA3|6920  
TCEAL1|9338  
TCEAL2|140597  
TCEAL3|85012  
TCEAL4|79921  
TCF21|6943  
TCF4|6925  
TCIRG1|10312  
TDH|157739  
TDO2|6999  
TEAD4|7004  
TEPP|374739  
TESC|54997  
TFB2M|64216  
TFCP2L1|29842  
TFDP1|7027  
TFF2|7032  
TGFA|7039  
TGFB11|7041  
TGFB3|7043  
TGFB|7045  
TGFB3|7049  
TGIF1|7050  
TGM1|7051  
TGM2|7052  
TH|7054  
THBS2|7058  
THBS3|7059  
THBS4|7060  
THNSL2|55258  
THOC3|84321  
THOC4|10189  
THRA|7067  
THY1|7070  
THYN1|29087  
TIA1|7072  
TIAF1|9220  
TICAM2|353376  
TIGD2|166815  
TIMP1|7076  
TIMP2|7077  
TIMP3|7078  
TINAGL1|64129  
TJAP1|93643  
TJP2|9414  
TJP3|27134  
TK1|7083  
TLE2|7089

TLN1|7094  
TLR6|10333  
TM4SF1|4071  
TM4SF19|116211  
TM7SF2|7108  
TM9SF2|9375  
TMC4|147798  
TMC7|79905  
TMEM119|338773  
TMEM125|128218  
TMEM132A|54972  
TMEM135|65084  
TMEM139|135932  
TMEM147|10430  
TMEM154|201799  
TMEM158|25907  
TMEM163|81615  
TMEM173|340061  
TMEM175|84286  
TMEM184A|202915  
TMEM185B|79134  
TMEM189-UBE2V1|387522  
TMEM2|23670  
TMEM204|79652  
TMEM205|374882  
TMEM216|51259  
TMEM22|80723  
TMEM38B|55151  
TMEM45A|55076  
TMEM47|83604  
TMEM48|55706  
TMEM50B|757  
TMEM51|55092  
TMEM62|80021  
TMEM64|169200  
TMEM88|92162  
TMEM91|641649  
TMEM97|27346  
TMEM99|147184  
TMOD1|7111  
TMPO|7112  
TMPRSS11D|9407  
TMPRSS2|7113  
TMTC4|84899  
TNC|3371  
TNFAIP2|7127  
TNFAIP3|7128  
TNFAIP6|7130  
TNFAIP8L3|388121  
TNFRSF10A|8797  
TNFRSF12A|51330  
TNFRSF14|8764  
TNFRSF18|8784  
TNFRSF19|55504  
TNFRSF1B|7133  
TNFRSF21|27242  
TNFRSF6B|8771  
TNFSF10|8743  
TNFSF13B|10673  
TNNC1|7134  
TNS1|7145  
TOB1|10140  
TOP2B|7155  
TOX2|84969  
TOX3|27324  
TP53INP1|94241  
TP53TG1|11257  
TPD52|7163  
TPD52L1|7164  
TPI1|7167  
TPK1|27010  
TPM2|7169  
TPM4|7171  
TPP1|1200  
TPST1|8460  
TPX2|22974  
TRAK1|22906  
TRAM2|9697  
TRAPPC6A|79090  
TRIM2|23321  
TRIM21|6737  
TRIM24|8805

TRIM47|91107  
TRIP13|9319  
TRIT1|54802  
TRO|7216  
TROAP|10024  
TRPM4|54795  
TRPV2|51393  
TRPV6|55503  
TSC22D2|9819  
TSC22D3|1831  
TSEN2|80746  
TSHZ2|128553  
TSHZ3|57616  
TSPAN12|23554  
TSPAN13|27075  
TSPAN15|23555  
TSPAN18|90139  
TSPAN4|7106  
TSPAN5|10098  
TSPAN6|7105  
TSPAN8|7103  
TSPAN9|10867  
TSPO|706  
TSPYL2|64061  
TSPYL5|85453  
TST|7263  
TTC39B|158219  
TTK|7272  
TUBA1C|84790  
TUBA4A|7277  
TUBB|203068  
TUBB2A|7280  
TUBB3|10381  
TUBB6|84617  
TUBG2|27175  
TUFT1|7286  
TXK|7294  
TXNIP|10628  
TXNRD2|10587  
TYMP|1890  
TYROBP|7305  
UBA3|9039  
UBA7|7318  
UBAP1|51271  
UBE2C|11065  
UBE2E2|7325  
UBE2G1|7326  
UBE2L6|9246  
UBE2T|29089  
UBL3|5412  
UBQLN1|29979  
UBTD1|80019  
UCHL1|7345  
UCHL5|51377  
UCK2|7371  
UFC1|51506  
UGT1A1|54658  
UGT1A6|54578  
UGT2B7|7364  
UHRF1|29128  
UPK1A|11045  
UPK1B|7348  
UPK2|7379  
UPK3A|7380  
UPK3B|80761  
UQCR10|29796  
USP21|27005  
UST|10090  
VAMP8|8673  
WARS|7453  
VASH1|22846  
WASH3P|374666  
VASN|114990  
VAT1|10493  
WBP1|23559  
WBP5|51186  
WBSCR22|114049  
VCAM1|7412  
VCAN|1462  
VDAC1|7416  
WDR43|23160  
WDR6|11180

WDR66|144406  
WDR72|256764  
WDR86|349136  
VEGFC|7424  
WFDC1|58189  
WFDC5|149708  
WFS1|7466  
VGLL1|51442  
VHL|7428  
VIM|7431  
VIPR1|7433  
WISP1|8840  
WISP2|8839  
WNNT5B|81029  
WNT7B|7477  
VPS35|55737  
VPS37D|155382  
VPS41|27072  
VRK1|7443  
WRNIP1|56897  
VSIG2|23584  
VSIG4|11326  
VSNL1|7447  
VTCN1|79679  
VWA1|64856  
WWC1|23286  
VWF|7450  
XAF1|54739  
XBP1|7494  
XPC|7508  
XPOT|11260  
XRCC3|7517  
YEATS4|8089  
YME1L1|10730  
ZBED2|79413  
ZBTB16|7704  
ZBTB20|26137  
ZBTB46|140685  
ZCCHC24|219654  
ZCWPW1|55063  
ZDHH1|29800  
ZDHH13|54503  
ZEB2|9839  
ZFH3|463  
ZHX2|22882  
ZIC2|7546  
ZMYND11|10771  
ZMYND15|84225  
ZNF124|7678  
ZNF20|7568  
ZNF217|7764  
ZNF219|51222  
ZNF248|57209  
ZNF254|9534  
ZNF285|26974  
ZNF302|55900  
ZNF320|162967  
ZNF321|399669  
ZNF338|7582  
ZNF358|140467  
ZNF365|22891  
ZNF415|55786  
ZNF428|126299  
ZNF433|163059  
ZNF436|80818  
ZNF439|90594  
ZNF443|10224  
ZNF462|58499  
ZNF467|168544  
ZNF493|284443  
ZNF512B|57473  
ZNF521|25925  
ZNF532|55205  
ZNF573|126231  
ZNF585A|199704  
ZNF626|199777  
ZNF627|199692  
ZNF679|168417  
ZNF680|340252  
ZNF681|148213  
ZNF682|91120  
ZNF702P|79986

ZNF750|79755  
ZNF763|284390  
ZNF786|136051  
ZNF792|126375  
ZNF816A|125893  
ZNF823|55552  
ZNF827|152485  
ZNF91|7644  
ZNF93|81931  
ZRSR2|8233  
ZSCAN16|80345  
ZSCAN2|54993  
ZWILCH|55055  
ZWINT|11130  
ZYX|7791

>UNC\_classifier  
AHNAK2|113146  
ALOX5AP|241  
BHMT|635  
C10orf116|10974  
CAPN5|726  
CD14|929  
CDK6|1021  
CHST15|51363  
CYP2J2|1573  
CYP4B1|1580  
EMP3|2014  
FAM174B|400451  
FAM59A|64762  
FAP|2191  
FBP1|2203  
GATA3|2625  
GDPD3|79153  
GLIPR1|11010  
GPD1L|23171  
HMGCS2|3158  
MSN|4478  
MT1X|4501  
MT2A|4502  
PALLD|23022  
PDGFC|56034  
PLEKHG6|55200  
PPARG|5468  
PPFIBP2|8495  
PRKCDBP|112464  
PRRX1|5396  
RAB15|376267  
RNF128|79589  
SCNN1B|6338  
SCNN1G|6340  
SEMA5A|9037  
SLC27A2|11001  
SLC9A2|6549  
SPINK1|6690  
TBX2|6909  
TMEM97|27346  
TMPRSS2|7113  
TOX3|27324  
TRAK1|22906  
TUBB6|84617  
UPK1A|11045  
UPK2|7379  
VGLL1|51442
